# Supplementary material for: The fate of poly- and perfluoroalkyl substances in a marine food web influenced by land-based sources in the Norwegian Arctic
Source: Royal Society of Chemistry journal article supplement (doi:10.1039/d0em00510j), 2021-01-01
Supplement: d0em00510j1.pdf [file d0em00510j1.pdf]

## The fate of poly- and perfluoroalkyl substances in a marine food web influenced by land-based sources in the Norwegian Arctic

### SUPPLEMENTARY INFORMATION

Aasim M. Ali<sup>a,b\*</sup>, Håkon A. Langberg<sup>c,d</sup>, Sarah E. Hale<sup>c</sup>, Roland Kallenborn<sup>b,e</sup>, William F. Hartz<sup>f,g</sup>, Åse-Karen Mortensen<sup>d</sup>, Tomasz Maciej Ciesielski<sup>d</sup>, Carrie A. McDonough<sup>h</sup>, Bjørn Munro Jenssen<sup>d,i</sup> and Gijs D. Breedveld<sup>c,j</sup>

<sup>a</sup> Department of Contaminants and Biohazards, Institute of Marine Research, Bergen NO-5817, Norway

<sup>b</sup> Faculty of Chemistry, Biotechnology and Food Sciences (KBM), Norwegian University of Life Sciences (NMBU), NO-1432 Aas, Norway

<sup>c</sup> Geotechnics and Environment, Norwegian Geotechnical Institute (NGI), NO-0855 Oslo, Norway

<sup>d</sup> Department of Biology, Norwegian University of Science and Technology (NTNU), NO-7491 Trondheim, Norway

<sup>e</sup> Department of Arctic Technology Department (AT), University Centre in Svalbard (UNIS), NO-9171 Longyearbyen, Svalbard, Norway

<sup>f</sup> Department of Earth Sciences, University of Oxford, South Parks Road, Oxford, OX1 3AN, UK

<sup>g</sup> Department of Arctic Geology Department (AG), University Centre in Svalbard (UNIS), NO-9171 Longyearbyen, Svalbard, Norway

<sup>h</sup> Department of Civil Engineering, Stony Brook University, Stony Brook, NY 11794, USA

<sup>i</sup> Department of Biosciences, Aarhus University, DK-4000 Roskilde, Denmark.

<sup>j</sup> Department of Geosciences, University of Oslo, NO- 0371 Oslo, Norway

\* Corresponding author: [aasim.ali@hi.no](mailto:aasim.ali@hi.no)

### Sample collection data

Table S1. Properties of investigated water samples

| Location   | Water samples (L) | Field                          |                              | Laboratory |                              |
|------------|-------------------|--------------------------------|------------------------------|------------|------------------------------|
|            |                   | EC ( $\mu\text{S}/\text{cm}$ ) | Temp. ( $^{\circ}\text{C}$ ) | pH         | Temp. ( $^{\circ}\text{C}$ ) |
| Landfill   | 1.5               | 2550                           | 5.20                         | 7.60       | 13.20                        |
| LY-river   | 1.5               | 218                            | 2.40                         | 6.10       | 11.00                        |
| FFTS-pond  | 1.5               | 308                            | 3.90                         | 6.50       | 11.20                        |
| FFTS-creek | 1.5               | 237                            | 6.90                         | 6.40       | 10.40                        |
| Ref-creek  | 1.5               | 62.4                           | -                            | 5.80       | 19.90                        |

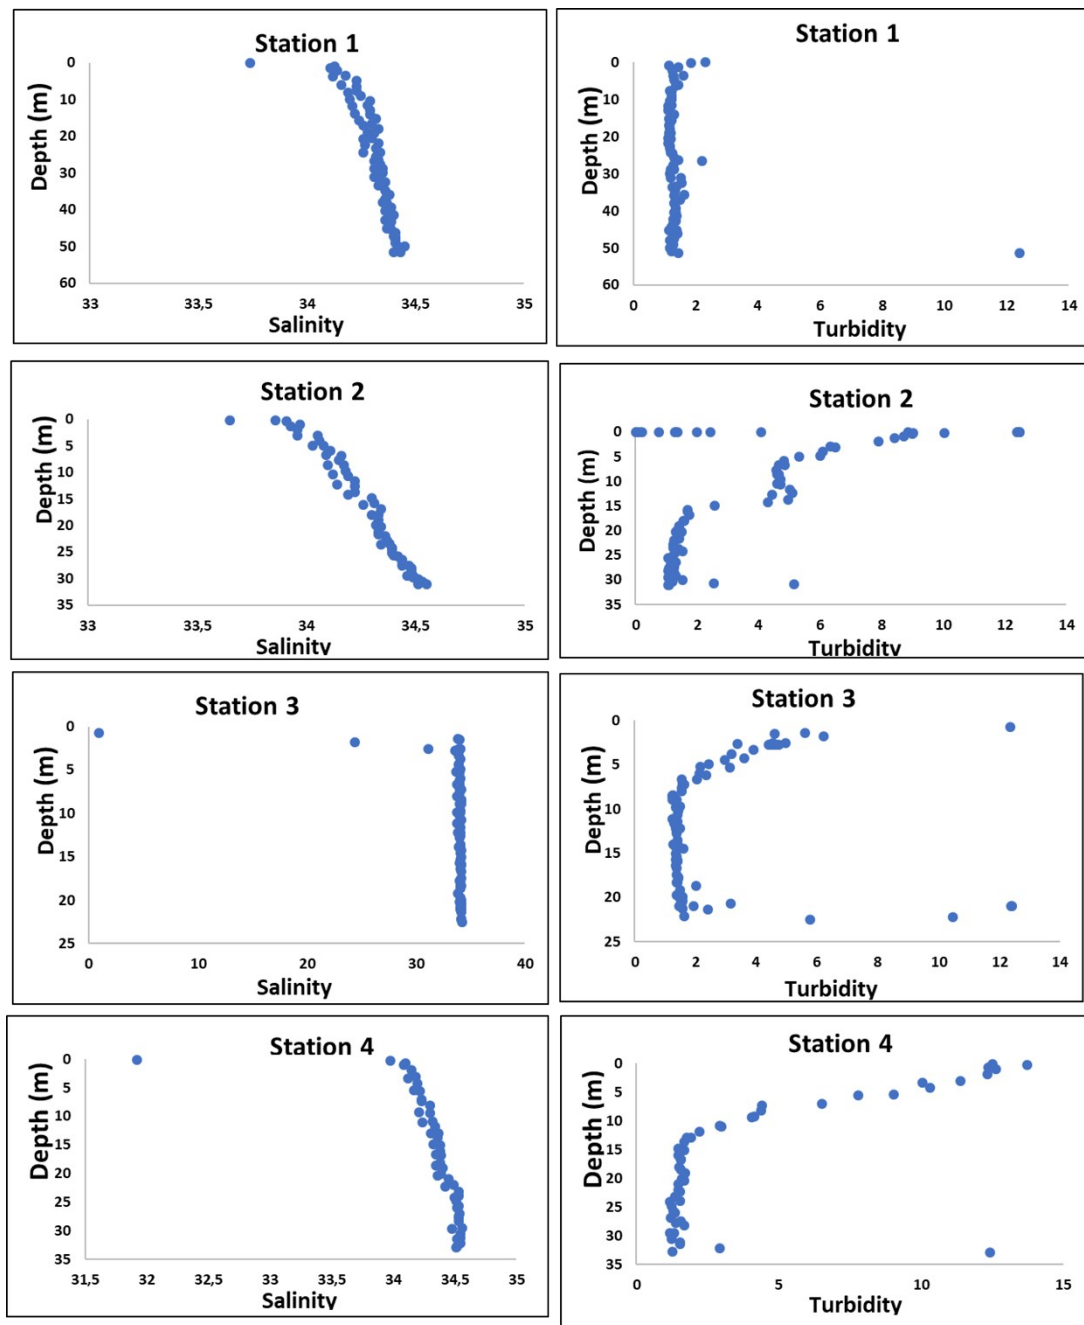

Figure S1. Turbidity and salinity depth profile at stations 1-4 in Adventfjorden.

Table S2. Weight of collected plankton and polychaete samples from different stations

| Station | Plankton (g) | Polychaete (g) |
|---------|--------------|----------------|
| St1     | 24.88        | 11.08          |
| St2     | 25.59        | 10.84          |
| St3     | 16.51        | 12.14          |
| St4     | 36.01        | 9.00           |

Table S3. Biological parameters for collected crab individuals (*Hyas araneus*) from Adventfjorden/Isfjorden.

| Station | Sample Name | Sex | Width (cm) | Length (cm) | Weight (g) |
|---------|-------------|-----|------------|-------------|------------|
| St1     | Cr-1        | M   | 6.5        | 8.6         | 123.89     |
|         | Cr-2        | M   | 5.3        | 6.8         | 77.45      |
|         | Cr-3        | M   | 5.1        | 7.2         | 77.45      |
|         | Cr-4        | M   | 3.6        | 5.5         | 43.84      |
|         | Cr-5        | M   | 3.6        | 5.3         | 38.09      |
|         | Cr-6        | F   | 3.4        | 4.6         | 21.71      |
|         | Cr-7        | M   | 4.4        | 6.3         | 54.88      |
|         | Cr-8        | M   | 4.2        | 5.8         | 38.78      |
|         | Cr-9        | M   | 5.5        | 7.4         | 116.01     |
|         | Cr-10       | M   | 3.4        | 4.6         | 22.29      |
|         | Cr-11       | M   | 2.7        | 4.0         | 13.27      |
|         | Cr-12       | M   | 5.1        | 7.4         | 97.95      |
|         | Cr-13       | M   | 5.1        | 7.4         | 93.72      |
|         | Cr-14       | M   | 4.7        | 6.9         | 96.38      |
| St2     | Cr-1        | M   | 6.1        | 7.6         | 108.51     |
|         | Cr-2        | M   | 5.4        | 7.3         | 88.08      |
|         | Cr-3        | F   | 4.4        | 5.4         | 32.19      |
|         | Cr-4        | M   | 6.2        | 8.7         | 108.59     |
|         | Cr-5        | M   | 3.3        | 4.5         | 19.83      |
|         | Cr-6        | M   | 6.7        | 8.9         | 184.38     |
|         | Cr-7        | M   | 6.3        | 8.4         | 118.62     |
|         | Cr-8        | F   | 3.2        | 4.6         | 20.02      |
|         | Cr-9        | M   | 3.5        | 4.9         | 25.56      |
|         | Cr-10       | M   | 2.9        | 4.3         | 17.83      |
|         | Cr-11       | M   | 6.1        | 8.0         | 157.00     |
|         | Cr-12       | M   | 4.3        | 5.9         | 53.88      |
|         | Cr-13       | M   | 5.7        | 7.9         | 107.90     |
|         | Cr-14       | M   | 6.0        | 8.2         | 155.52     |
| St3     | Cr-1        | -   | -          | -           | -          |
| St4     | CR-1        | F   | 5.6        | 6.8         | 59.48      |
|         | Cr-2        | F   | 5.0        | 6.6         | 64.12      |
|         | Cr-3        | F   | 4.6        | 5.8         | 46.13      |
|         | Cr-4        | F   | 4.8        | 6.5         | 69.15      |
|         | Cr-5        | M   | 6.4        | 8.2         | 150.49     |
|         | Cr-6        | M   | 6.5        | 8.4         | 126.04     |
|         | Cr-7        | M   | 4.9        | 6.4         | 76.93      |
|         | Cr-8        | F   | 5.0        | 6.8         | 73.33      |
|         | CR-9        | F   | 5.0        | 6.9         | 91.29      |

Table S4. Biological parameters of collected fish. SC: sculpin (*Myoxocephalus scorpius*). WF: wolffish

| Station | Sample Name | Weight (g) | Length (cm) | Liver weight (g) | Muscle sample (g) |
|---------|-------------|------------|-------------|------------------|-------------------|
| St1     | SC-1        | 126.6      | 21.6        | 2.97             | 11.77             |
|         | SC-2        | 61.79      | 18.1        | 1.49             | 6.95              |
|         | SC-3        | 529.88     | 30.9        | 32.61            | 21.1              |
|         | SC-4        | 263.76     | 25.7        | 15.07            | 14.18             |
|         | WF-1        | 856.1      | 45.8        | 26.1             | 30.76             |
| St2     | SC-1        | 279.3      | 27          | 11.79            | 20.58             |
|         | SC-2        | 243.9      | 25.9        | 17.18            | 16.73             |
|         | SC-3        | 358.22     | 27.5        | 22.02            | 17.3              |
|         | WF-1        | 2220       | 56.4        | 41.01            | 50.09             |
| St3     | SC-1        | 151.08     | 22.8        | 6.16             | 21.17             |
|         | SC-2        | 109.8      | 21          | 1.57             | 18.17             |
|         | SC-3        | 127.17     | 21.1        | 5.93             | 6.69              |
|         | SC-4        | 367.97     | 29.3        | 14.2             | 19.86             |
|         | SC-5        | 217.39     | 22.5        | 15.45            | 12.3              |
|         | SC-6        | 78.49      | 18.2        | 2.09             | 6.93              |
|         | SC-7        | 229.4      | 24.4        | 10.94            | 15.12             |
|         | SC-8        | 88.48      | 16.9        | 2.88             | 1213              |
|         | SC-9        | 73.22      | 18.1        | 1.34             | 9.14              |
|         | SC-10       | 69.92      | 17.4        | 1.89             | 5.54              |
|         | SC-11       | 102.77     | 19.1        | 7.78             | 9.37              |
| St4     | SC-1        | 75.35      | 18.2        | 2.13             | 14.81             |
|         | SC-2        | 131.72     | 21.18       | 3.32             | 19.45             |
|         | SC-3        | 62.52      | 17.8        | 0.56             | 8.76              |
|         | SC-4        | 87.93      | 20.3        | 1.71             | 11.46             |
|         | SC-5        | 232.83     | 26.4        | 5.39             | 24.28             |
|         | SC-6        | 89.69      | 19.4        | 2.75             | 11.99             |
|         | SC-7        | 113.88     | 21.3        | 3.23             | 7.19              |
|         | SC-8        | 92.3       | 19.1        | 2.66             | 7.48              |
|         | WF-1        | 780        | 43.5        | 13.56            | 62.93             |

(*Anarhichas lupus*).

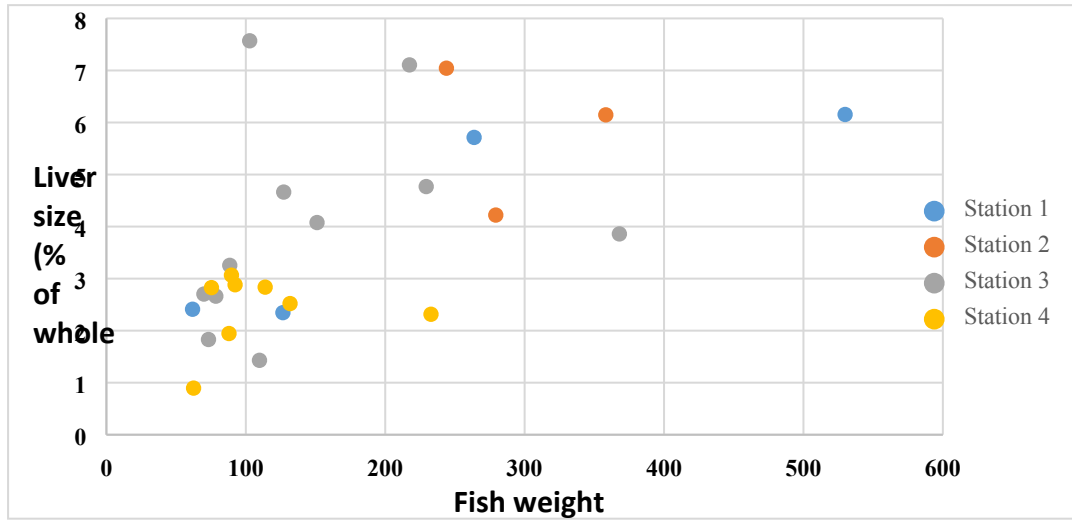

Figure S2. Sculpin (*Myoxocephalus scorpius*) relative liver size versus individual weight

| Sample Code | Sex    | Body mass (g) | Liver mass (g) | Gonad mass (g) | Heart mass (g) |
|-------------|--------|---------------|----------------|----------------|----------------|
| G-1         | male   | 1860          | 38.94          | 2.2            | 18.07          |
| G-2         | female | 1340          | 30.71          | 1.25           | 12.07          |
| G-3         | female | 1580          | 36.22          | 1.83           | 14.9           |
| G-4         | female | 1610          | 37.7           | 1.81           | 11.6           |
| G-5         | female | 1573          | 41.26          | 2.11           | 13.31          |
| G-6         | female | 1855          | 39.45          | 1.79           | 14.97          |
| G-7         | female | 1371          | 37.11          | 1.27           | 11.27          |
| G-8         | male   | 2196          | 40             | 3.11           | 15.91          |
| G-9         | male   | 2141          | 38.87          | na             | 15.57          |
| G-10        | male   | 1947          | 44.17          | 2.78           | 16.84          |
| G-11        | female | 1355          | 35.46          | 1.32           | 11.25          |
| G-12        | male   | 1943          | 40.19          | 5.19           | 14.38          |
| G-13        | female | 1434          | 33.01          | 0.49           | 11.8           |
| G-14        | female | 1363          | 26.1           | 1.62           | 12.61          |
| G-15        | male   | 2026          | 43.2           | 3.92           | 18.12          |
| G-16        | male   | 2210          | 43.9           | 3.41           | 17.12          |
| G-17        | female | 1700          | 50.06          | 4.3            | 12.99          |
| G-18        | female | 1640          | 36.7           | 1.98           | 13.91          |
| G-19        | male   | 2011          | 29.21          | 2.38           | 16.3           |
| G-20        | female | 1407          | 45.29          | 0.61           | 11.92          |

Table S5. Biological parameters of collected glaucous gulls (*Larus hyperboreus*).

## Detailed description of the chemical analysis

### Standards and Chemicals

The following chemicals were applied for sample preparation and clean-up for subsequent LC/MS analysis: Glacial acetic acid ( $\text{CH}_3\text{COOH}$ , ACS reagent,  $\geq 99.7\%$ , Merck KGaA, Darmstadt, Germany), Q-guard 1 (MilliQ water purification, Billerica, MA, USA), Methanol (MeOH, HPLC grade, VWR International AS, Oslo, Norway), ammonium acetate ( $\text{NH}_4\text{CH}_3\text{CO}_2$ , 98.0%, Merck, Darmstadt, Germany), sodium hydroxide (NaOH, Sigma-Aldrich,  $\geq 97.0\%$ , St. Louis, MO), hydrochloric acid (HCl, 35%, Sigma-Aldrich, St. Louis, MO). All PFAS and their isotopically labeled internal standards (ISTDs) (Table S6) and analytical standards (all  $>98\%$ ) were produced by Wellington Laboratories (Guelph, Canada) and supplied by Greyhound Chromatography and Allied Chemicals (Merseyside, England).

#### 1. Preparation of water samples

Water samples were prepared according to <sup>1,2</sup> with some modifications. Unfiltered water samples (750 mL each, spiked  $50\mu\text{L}$  of  $500\text{ ng mL}^{-1}$  ISTDs mix) were extracted by solid-phase extraction (SPE) using mixed mode reverse phase/weak anion exchange (WAX); Oasis<sup>®</sup> WAX (500 mg, 6 cc,  $60\mu\text{m}$ , Waters, Milford MA, USA). The SPE cartridges were placed on a vacuum manifold and were conditioned by 4 mL of 0.1 % ammonia in methanol followed by 4 mL of methanol and 4 mL of Milli-Q water. SPE-cartridges were kept wet using additional 4 mL of Milli-Q water before loading the samples through a reservoir adapter and polypropylene (PP) tubing (o. d.  $1/8''$ ). Samples were loaded by the aid of a mild vacuum (water jet) and the flow rate was kept at 1-3 drop per second. The cartridges were cleaned with 4 mL acetate buffer of pH 4 and dried under vacuum for 15 min. Afterwards, the cartridges were eluted using 4 mL of methanol followed by 4 mL of 0.1%  $\text{NH}_3$  in methanol. The eluates were collected in 15 mL polypropylene centrifuge tubes (VWR International, Radnor, PA, USA). The resulting eluates were dried at  $37^\circ\text{C}$  under a gentle stream of  $\text{N}_2$  (AGA, Oslo, Norway,  $\text{N}_2$  5.0 quality) using a Reacti-Therm III evaporating unit (Thermo Fisher Scientific Inc., Rockford, USA). Twenty microliters of recovery standard ( $500\text{ ng mL}^{-1}$ ) were added to each sample followed by addition of  $450\mu\text{L}$  MeOH. The residues were re-dissolved in 0.5 mL of methanol using vortex mixing (VWR mixer mini vortex 230V EU, VWR International, Radnor, PA, USA), filtered through a  $0.2\mu\text{m}$  nylon membrane microcentrifuge filter (Spin-X, Costar, Corning Inc., Corning, NY, USA), and transferred into PP vials for HPLC-MS/MS.

Table S6. The 14 poly- and perfluoroalkyl substances (PFAS) quantified in the Longyearbyen study

| Analyte Name                    | Acronym | CAS #      | Formula                                                                            | Structure* | LogP** | LogD (7.4)** | Log K <sub>oc</sub>                   |
|---------------------------------|---------|------------|------------------------------------------------------------------------------------|------------|--------|--------------|---------------------------------------|
| <b>PFCA</b>                     |         |            |                                                                                    |            |        |              |                                       |
| Perfluorohexanoic acid          | PFHxA   | 307-24-4   | F(CF <sub>2</sub> ) <sub>5</sub> COOH                                              |            | 5.97   | 0.15         | 1.31 <sup>3</sup>                     |
| Perfluoroheptanoic acid         | PFHpA   | 375-85-9   | F(CF <sub>2</sub> ) <sub>6</sub> COOH                                              |            | 6.86   | 1.11         | 1.63 <sup>3</sup> , 2.1 <sup>4</sup>  |
| Perfluorooctanoic acid          | PFOA    | 335-67-1   | F(CF <sub>2</sub> ) <sub>7</sub> COOH                                              |            | 7.75   | 1.82         | 1.89–3.5 <sup>5-7,8</sup>             |
| Perfluorononanoic acid          | PFNA    | 375-95-1   | F(CF <sub>2</sub> ) <sub>8</sub> COOH                                              |            | 8.64   | 2.84         | 2.36–4.0 <sup>3-5,7</sup>             |
| Perfluorodecanoic acid          | PFDA    | 335-76-2   | F(CF <sub>2</sub> ) <sub>9</sub> COOH                                              |            | 9.53   | 3.62         | 2.96–4.6 <sup>3-5,7</sup>             |
| Perfluoroundecanoic acid        | PFUnDA  | 2058-94-8  | F(CF <sub>2</sub> ) <sub>10</sub> COOH                                             |            | 10.42  | 4.23         | 3.3–5.1 <sup>3-5,7</sup>              |
| Perfluorododecanoic acid        | PFDoDA  | 307-55-1   | F(CF <sub>2</sub> ) <sub>11</sub> COOH                                             |            | 11.31  | 4.58         | 5.6 ± 0.2 <sup>4</sup>                |
| perfluorotetradecanoic acid     | PFTriDA | 72629-94-8 | F(CF <sub>2</sub> ) <sub>12</sub> COOH                                             |            | 12.19  | 4.97         | -                                     |
| Perfluorododecanoate            | PFTeDA  | 376-06-7   | F(CF <sub>2</sub> ) <sub>13</sub> COOH                                             |            | 13.08  | 5.77         | -                                     |
| <b>PFSA</b>                     |         |            |                                                                                    |            |        |              |                                       |
| Perfluorobutane sulfonic acid   | PFBS    | 375-73-5   | F(CF <sub>2</sub> ) <sub>4</sub> SO <sub>3</sub> H                                 |            | 3.68   | -1.56        | 1.22 <sup>8</sup> , 1.79 <sup>3</sup> |
| Perfluorohexane sulfonic acid   | PFHxS   | 355-46-4   | F(CF <sub>2</sub> ) <sub>6</sub> SO <sub>3</sub> H                                 |            | 5.25   | -0.54        | 2.05–3.7 <sup>3,4,7</sup>             |
| Perfluorooctane sulfonic acid   | PFOS    | 1763-23-1  | F(CF <sub>2</sub> ) <sub>8</sub> SO <sub>3</sub> H                                 |            | 7.03   | 0.66         | 2.6–3.8 <sup>3-8</sup>                |
| <b>FTSA</b>                     |         |            |                                                                                    |            |        |              |                                       |
| 6:2 Fluorotelomer sulfonic acid | 6:2 FTS | 27619-97-2 | F(CF <sub>2</sub> ) <sub>6</sub> (CH <sub>2</sub> ) <sub>2</sub> SO <sub>3</sub> H |            | 3.47   | -1.00        | -                                     |
| <b>preFOS</b>                   |         |            |                                                                                    |            |        |              |                                       |
| Perfluorooctane sulfonamide     | FOSA    | 754-91-6   | C <sub>8</sub> H <sub>2</sub> F <sub>17</sub> NO <sub>2</sub> S                    |            |        |              | 4.2–4.5 <sup>6,7</sup>                |

\*All structures were prepared with ChemDraw Professional (version 15.0.0.106), PerkinElmer Informatics, Inc. (Boston, Massachusetts, USA) \*\* Predicted data is calculated with ACD/Labs Percepta Platform – PhysChem Module, Toronto, CA

## 2. Preparation of snow sample

A snow sample was collected according to <sup>1</sup>. An aluminum shovel was precleaned, rinsing with MilliQ and then MeOH and transported wrapped in MeOH rinsed aluminum foil. An LDPE container was precleaned by washing with soapy water, rinsing several times with tap water, rinsed 5 times with

MilliQ and then rinsed 3 times with MeOH. Surface snow was then collected with the precleaned shovel and the sampling container sealed. The snow was then melted at 5°C and two 1.5 L duplicates were taken. This was then extracted unfiltered the same as the water samples in Section 1.

### 3. Preparation of biota and sediment samples

A previously published method was adopted with some modification<sup>9</sup>. About 0.5-2.5 g of homogenized biological material was weighed in a 15 ml Falcon tube (VWR International, LLC Radnor, USA). Fifty microliters of <sup>13</sup>C-labeled PFAS internal standards mix (Wellington laboratories) mixture solution (500 ng mL<sup>-1</sup>) was added. Ten milliliters of MeOH were added to each sample and the sample was further homogenized with a sharp spatula. Samples were then sonicated at room temperature (20-22 °C) for ten minutes. Subsequently, the samples were mechanically shaken using Stuart Reciprocating shaker (SSL2, Bibby Scientific Ltd., Staffordshire, UK) for 30 minutes. The shaking was followed by centrifugation 10 min at 3000 rpm. The supernatant was removed with a plastic pipette and transferred to a new plastic tube. This stage was repeated by adding 4 ml of MeOH in the second extraction. The volume of the combined supernatants is reduced to 4 mL (37 °C) under a gentle flow of nitrogen gas (N<sub>2</sub>) (AGA, Oslo, Norway, N<sub>2</sub> 5.0 quality) using a Reacti-Therm III evaporating unit (Thermo Fisher Scientific Inc., Rockford, USA). Regarding the sediment sample, air-dried 5 g sediment was extracted as biota with an additional step with addition of 2 mL of NaOH solution (200 mM) prior to the extraction and 200 µL HCl solution (2 M) after the extraction according to <sup>10</sup>. About 0.5g of active coal Envi-Carb (ENVI-Carb™ 122, Sigma-Aldrich, Oslo, Norway) was added to each sample extract, the extract was then mixed and centrifuged for 10 min. The supernatant was removed and transferred to a new plastic tube. This step was repeated by adding an aliquot of methanol (1 mL) to the remaining deposits, and the supernatant was added to the corresponding tube. The supernatant was dried at 37 °C under N<sub>2</sub>-gas (AGA, Oslo, Norway, N<sub>2</sub> 5.0 quality) using a Reacti-Therm III evaporating unit (Thermo Fisher Scientific Inc., Rockford, USA). Twenty microliters of recovery standard (500 ng mL<sup>-1</sup>) were added to each sample followed by addition of 450 µL MeOH. The samples were then vortexed (VWR mixer mini vortex 230V EU, VWR International, Radnor, PA, USA), and subsequently filtered through a 0.2 µm microcentrifuge filter (Spin-X, Costar, Corning Inc., Corning, NY, USA). The resulting sample was finally transferred to polypropylene vials, and immediately analysed with HPLC-MS -QqQ.

### 4. HPLC-ESI-QqQ analysis

An Agilent 1200 series HPLC (Agilent Technologies, Waldbronn, Germany) coupled with an Agilent 6460 (Agilent Technologies, Santa Clara, CA, USA) triple quadrupole mass spectrometer (MS-QqQ) was used for quantification of PFASs. A Zorbax Eclipse plus C18 RRHD (2.1 x 100 mm, 1.8 µm) (Agilent, Palo Alto, USA) column was used for separation and quantification of the target compounds at 25 °C. The injection volume was 10 µL. The analytical column was protected with a respective Guard Cartridge (4 µm x 3.0 mm ID). Separation was conducted by a binary mobile phase gradient consisting of (A) Aqueous solution of NH<sub>4</sub>CH<sub>3</sub>CO<sub>2</sub> (5 mM) and (B) pure MeOH with a mobile phase flow rate of 0.2 mL/min. The initial mobile phase proportion was 15 % (B) which was held for 5 min. B was then linearly increased to 99 % over 5 min and held for 7 min. B was then linearly changed to 1% until the end of the quantitative analysis (total run = 26 min.). Analytes were ionized in an Agilent Jet Stream electrospray ion source in negative ionization mode. The ion source parameters were as follows; gas temperature was 300 °C and gas flow was 5 l/min, nebulizer pressure was 25 psi, sheath gas temperature was 400 °C, sheath gas flow was 8 l/min.

The produced ions were monitored in negative dynamic multiple reaction monitoring (dMRM). Table S2 contains information on the ion transitions monitored and their individual settings. Agilent MassHunter software (Version B.07.00 /Build 7.0.457.0, 2008) was used for instrument control, method validation and quantification. Combined chromatograms of the MRM transition for the product ions for each analyte are shown in Figure S3.



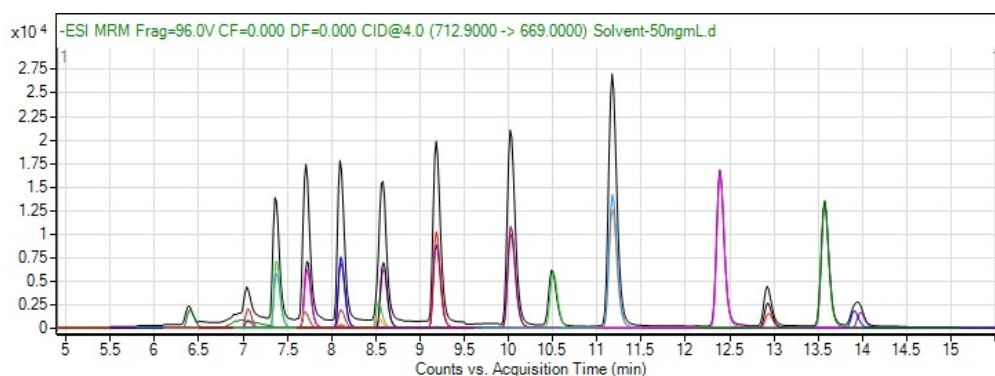

Figure S3. Extracted and Overlaid MRM of all compounds at 50 pg/μL

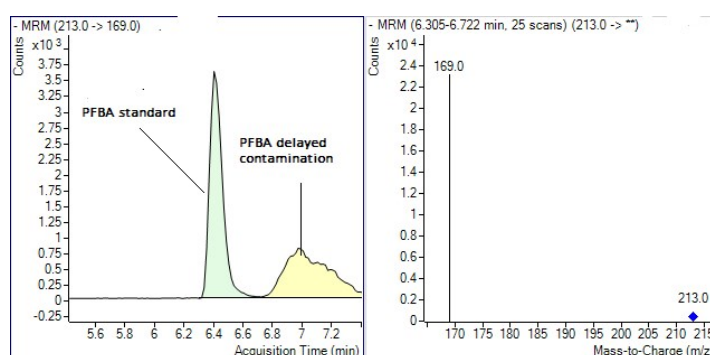

Figure S4. Extracted MRM of PFBA at 50 pg/μL

Table S7. Monitored ion transitions (dMRM) of target PFASs and their individual instrument settings; Retention time (RT) Precursor ion (Prec Ion), product ion (PI), Collision Energy (CE), Fragmentor voltage (FV), Retention time Window ( $\Delta$ RT), and Polarity. For Acronyms and structure information on the target compounds, see table S6. ISTD used: internal standard used.

| Acronym | ISTD                                    | RT (min) | $\Delta$ RT | Prec Ion (m/z) | PI 1 (m/z) | PI 2 (m/z) | PI 3 (m/z) | CE1 (V) | CE2 (V) | CE3 | Fragmentor (V) |
|---------|-----------------------------------------|----------|-------------|----------------|------------|------------|------------|---------|---------|-----|----------------|
| PFBA    | [ <sup>13</sup> C <sub>5</sub> ]-PFHxA  | 6.4      | 4           | 213            | 169        |            |            | 1       |         |     | 61             |
| PFHxA   | [ <sup>13</sup> C <sub>5</sub> ]-PFHxA  | 7.6      | 4           | 313            | 269        | 119        |            | 0       | 19      |     | 66             |
| PFHpA   | [ <sup>13</sup> C <sub>4</sub> ]-PFHpA  | 7.9      | 4           | 363            | 319        | 168.9      |            | 0       | 10      |     | 71             |
| PFOA    | [ <sup>13</sup> C <sub>4</sub> ]-PFOA   | 8.3      | 4           | 413            | 369        | 169        |            | 0       | 12      |     | 76             |
| PFNA    | [ <sup>13</sup> C <sub>5</sub> ]-PFNA   | 8.7      | 4           | 463            | 419        | 219        |            | 4       | 4       |     | 86             |
| PFDA    | [ <sup>13</sup> C <sub>2</sub> ]-PFDA   | 9.2      | 4           | 513            | 469        | 169        |            | 4       | 4       |     | 86             |
| PFUnDA  | [ <sup>13</sup> C <sub>2</sub> ]-PFUnDA | 9.9      | 4           | 563            | 519        | 169        |            | 4       | 10      |     | 86             |
| PFDoDA  | [ <sup>13</sup> C <sub>2</sub> ]-PFDoDA | 10.6     | 4           | 613            | 569        |            |            | 4       |         |     | 96             |
| PFBS    | [ <sup>18</sup> O <sub>2</sub> ]-PFHxS  | 7.2      | 4           | 299            | 99         | 80         |            | 25      | 35      |     | 121            |
| PFHxS   | [ <sup>18</sup> O <sub>2</sub> ]-PFHxS  | 7.9      | 4           | 398.9          | 99         | 80         |            | 45      | 45      |     | 151            |
| Br-PFOS | [ <sup>18</sup> O <sub>2</sub> ]-PFHxS  | 8.3      | 4           | 499            | 99         | 80         | 130        | 61      | 61      | 61  | 200            |
| L-PFOS  | [ <sup>13</sup> C <sub>4</sub> ]-PFOS   | 8.4      | 4           | 499            | 99         | 80         | 130        | 61      | 61      | 61  | 200            |
| 6:2 FTS | [ <sup>18</sup> O <sub>2</sub> ]-PFHxS  | 8.1      | 4           | 427            | 407        | 81         |            | 15      | 15      |     | 145            |
| FOSA    | [ <sup>2</sup> H <sub>3</sub> ]-MeFOSA  | 10.5     | 4           | 497.9          | 78         |            |            | 33      |         |     | 141            |

Table S8. Monitored ion transitions (dMRM) of internal standards used and their individual instrument settings; Retention time (RT) Precursor ion (Prec Ion), product ion (PI), Collision Energy (CE), Fragmentor voltage (FV), Retention time Window ( $\Delta$ RT), and Polarity.

| Acronym                                 | RT (min) | $\Delta$ RT | Prec Ion (m/z) | PI (m/z) | CE (V) | Fragmentor |
|-----------------------------------------|----------|-------------|----------------|----------|--------|------------|
| [ <sup>13</sup> C <sub>8</sub> ]-PFOA   | 8.34     | 4           | 421            | 376      | 0      | 76         |
| [ <sup>13</sup> C <sub>4</sub> ]-PFBA   | 6.58     | 4           | 217            | 172      | 1      | 61         |
| [ <sup>13</sup> C <sub>5</sub> ]-PFHxA  | 7.66     | 4           | 318            | 273      | 0      | 66         |
| [ <sup>13</sup> C <sub>4</sub> ]-PFHpA  | 7.99     | 4           | 367            | 322      | 0      | 66         |
| [ <sup>13</sup> C <sub>4</sub> ]-PFOA   | 8.35     | 4           | 417            | 372.1    | 0      | 76         |
| [ <sup>13</sup> C <sub>5</sub> ]-PFNA   | 8.79     | 4           | 468            | 423      | 4      | 76         |
| [ <sup>13</sup> C <sub>2</sub> ]-PFDA   | 9.34     | 4           | 515            | 470      | 4      | 86         |
| [ <sup>13</sup> C <sub>2</sub> ]-PFUnDA | 9.94     | 4           | 565            | 520      | 4      | 96         |
| [ <sup>13</sup> C <sub>2</sub> ]-PFDoDA | 10.86    | 4           | 615            | 570      | 4      | 96         |
| [ <sup>18</sup> O <sub>2</sub> ]-PFHxS  | 7.97     | 4           | 403            | 84       | 49     | 146        |
| [ <sup>13</sup> C <sub>4</sub> ]-PFOS   | 8.74     | 4           | 503            | 80       | 61     | 180        |
| [ <sup>2</sup> H <sub>3</sub> ]-MeFOSA  | 9.34     | 4           | 515            | 169      | 25     | 136        |

## Validation of the Analytical Method

### 1. Recovery and detection limits

The apparent recoveries for all PFAS and their ISTDs from spiked samples were calculated using the following equation:

$$\text{Apparent Recovery\%} = 100 * \frac{C(\text{sample}) - C(\text{matrix blank})}{C(\text{spiked})}$$

Where C (sample) is the calculated concentration in the spiked sample, C (matrix blank) is the calculated background concentration in the matrix used, and C(spiked) is the concentration spiked into the sample.

Four and six replicates of each sample type (water, sediment, fish muscle, fish liver, plankton, worms, crab, and gull liver) were prepared and spiked with a mixture of all target PFASs and their ISTDs, while matrix blanks were spiked with only ISTDs. Six seawater samples were spiked at final concentration of 25 ng/L and four seawater samples were spiked at final concentration of 3 ng/L. For sediment and biota, 4 samples were spiked at 1 ng/g and six samples were spiked at 25 ng/g. All spiked samples with their blanks were then extracted and treated as real sample. The obtained recoveries are presented in Table S11. In general, most PFAS showed satisfying recoveries (42 – 120%) in the initial method validation as shown in Table S11. For N-MeFOSE, N-MeFOSA, N-EtFOSE, and N-EtFOSA, however, unacceptable recovery rates from some matrices were achieved, and were consequently excluded from further quantitative analysis from these matrices (red highlighted in Table S11). Sample specific recovery rates for all internal standards (ISTD) from different samples were calculated applying known concentrations of [<sup>13</sup>C<sub>8</sub>]-PFOA as a recovery standard (Table S12). Instrumental limit of detection (LOD), instrumental lower limit of quantification (LOQ), and method detection limit (MDL) in abiotic and biotic samples, values are summarised in Table S9.

### 2. Matrix effect

Matrix effects (ME) caused by some co-eluting components from the residual matrix, are common in HPLC-ESI-QqQ methods<sup>11</sup>. ME influences the ionization efficiency of the target analytes. Typically, this results in suppression or enhancement of target compound signal<sup>12</sup>. In general, MEs are not reproducible among various sample sets or even replicates of the same set of samples and, therefore, compromise the quantitative analysis if not appropriately assessed<sup>13, 14</sup>. Therefore, here we evaluated MEs as we have investigated complex environmental samples. ME was estimated applying the following equation, where S<sub>m</sub> and S<sub>s</sub> represent the slopes of the matrix matched and solvent matched calibration curves respectively.

$$ME\% = \left[ \left( \frac{S_m}{S_s} \right) - 1 \right] \times 100$$

The results are summarized in Table S10. ME% values outside the range –20% to +20% indicate significant effects. Therefore, in sediment and biota samples, all PFASs experienced significant effect. We found that the use of ISTDs was not compensated for these effects, therefore, calibration standards including both native and ISTDs were prepared in similar matrix extracts using real samples collected from the reference in order to confirm the linear range of the method for reliable quantification.

### **3. Blank samples**

Milli-Q water and clean sodium sulfate were used in the field during abiotic and biotic sample collection in order to monitor for possible contamination during sample collection, transport, and storage and analyzed as field blanks. Certain PFAS; PFBA, PFOA, and 6:2 FTS were detected in some of these blank samples at average concentration of 0.12, 0.010, and 0.034 ng/mL, respectively.

Table S9. Instrument limit of detection (ILOD), instrument limit of quantification (ILOQ), and method detection limit (MDL). For abbreviations and structure information on the target compounds see table S6

| Compound | ILOD (ng/mL) | ILOQ (ng/mL) | MDL-Water (ng/L) | MDL-Fish liver (ng/g) | MDL-Fish Muscle (ng/g) | MDL-Sediment (ng/g) | MDL-Crab (ng/g) | MDL-Plankton (ng/g) | MDL-Worms (ng/g) | MDL-Gull liver (ng/g) |
|----------|--------------|--------------|------------------|-----------------------|------------------------|---------------------|-----------------|---------------------|------------------|-----------------------|
| PFBA     | 0.007        | 0.022        | 0.150            | 0.094                 | 0.02                   | 0.320               | 0.80            | 0.600               | 5.3              | 0.08                  |
| PFHxA    | 0.012        | 0.040        | 0.270            | 0.060                 | 0.030                  | 0.003               | 0.003           | 0.003               | 0.040            | 0.045                 |
| PFHpA    | 0.015        | 0.051        | 0.340            | 0.015                 | 0.020                  | 0.002               | 0.003           | 0.003               | 0.011            | 0.0033                |
| PFOA     | 0.004        | 0.015        | 0.180            | 0.020                 | 0.010                  | 0.045               | 0.012           | 0.003               | 0.017            | 0.010                 |
| PFNA     | 0.010        | 0.033        | 0.070            | 0.040                 | 0.050                  | 0.008               | 0.010           | 0.003               | 0.015            | 0.013                 |
| PFDA     | 0.004        | 0.014        | 0.080            | 0.030                 | 0.090                  | 0.040               | 0.003           | 0.002               | 0.060            | 0.040                 |
| PFUnDA   | 0.010        | 0.030        | 0.220            | 0.030                 | 0.020                  | 0.020               | 0.020           | 0.003               | 0.060            | 0.010                 |
| PFDoDA   | 0.050        | 0.160        | 0.110            | 0.070                 | 0.050                  | 0.030               | 0.060           | 0.002               | 0.018            | 2.24                  |
| PFTTrDA  | 0.040        | 0.150        | 0.100            | 0.030                 | 0.010                  | 0.030               | 0.040           | 0.005               | 0.015            | 0.17                  |
| PFTeDA   | 0.040        | 0.140        | 0.090            | 0.090                 | 0.070                  | 0.030               | 0.040           | 0.009               | 0.014            | 0.80                  |
| PFBS     | 0.050        | 0.160        | 0.110            | 0.016                 | 0.050                  | 0.018               | 0.020           | 0.005               | 0.016            | 0.27                  |
| PFHxS    | 0.021        | 0.070        | 0.790            | 0.016                 | 0.010                  | 0.011               | 0.101           | 0.090               | 0.010            | 0.20                  |
| PFOS     | 0.060        | 0.190        | 0.240            | 0.050                 | 0.040                  | 0.014               | 0.063           | 0.030               | 0.010            | 0.30                  |
| 6:2 FTS  | 0.040        | 0.010        | 1.08             | 0.015                 | 0.060                  | 0.030               | 0.050           | 0.410               | 0.05             | 0.38                  |
| FOSA     | 0.010        | 0.030        | 0.070            | 0.003                 | 0.010                  | 0.010               | 0.150           | 4.55                | 0.04             | 0.06                  |
| N-MeFOSE | 0.070        | 0.220        | 0.150            | 0.079                 | 0.010                  | 2.00                | 0.070           | 1.30                | 0.22             | 0.51                  |
| N-MeFOSA | 0.010        | 0.040        | 0.030            | 0.047                 | 0.010                  | 0.08                | 0.170           | 6.25                | 0.04             | 0.51                  |
| N-EtFOSE | 0.010        | 0.040        | 0.030            | 0.015                 | 0.014                  | 0.030               | 1.11            | 1.54                | 0.04             | 2.50                  |
| N-EtFOSA | 0.040        | 0.130        | 0.090            | 0.016                 | 0.016                  | 0.010               | 0.270           | 8.82                | 0.13             | 0.17                  |

Table S10. Matrix effect (ME %); negative values indicate ion suppression and positive values indicate signal enhancement. For abbreviations and structure information on the target compounds

| Compound | Water | Sediment | Crab  | Plankton | Gull liver | Fish Liver | Fish Muscle |
|----------|-------|----------|-------|----------|------------|------------|-------------|
| PFBA     | -95.2 | -80.0    | -98.6 | -89.9    | -96.6      | -99.0      | -79.1       |
| PFHxA    | -86.2 | -74.5    | -96.5 | -63.1    | -89.1      | -99.4      | -76.9       |
| PFHpA    | -70.1 | -68.1    | -96.6 | -50.5    | -84.3      | -98.6      | -77.2       |
| PFOA     | -56.4 | -66.6    | -92.7 | -51.5    | -92.3      | -98        | -77.2       |
| PFNA     | -40.0 | -64.9    | -90.4 | -34.5    | -76.0      | -96.9      | -49.9       |
| PFDA     | -21.2 | -68.3    | -86.3 | -38.8    | -79.3      | -97.4      | -48.7       |
| PFUnDA   | 1.80  | -67.1    | -80.3 | -40.9    | -73.0      | -95.3      | -41.8       |
| PFDoDA   | -12.1 | -64.4    | -71.3 | -65.4    | -73.0      | -91.8      | -29.3       |
| PFTTrDA  | -16.1 | -65.9    | -77.0 | -39.0    | -89.4      | -96.1      | -40.8       |
| PFTeDA   | -16.1 | -68.5    | -97.4 | -67.4    | -94.0      | -95.3      | -40.2       |
| PFBS     | -61.5 | -77.3    | -93.5 | -69.6    | -89.1      | -98.0      | -67.2       |
| PFHxS    | -7.90 | -70.0    | -92.0 | -55.3    | -84.8      | -97.9      | -62.9       |
| PFOS     | -23.8 | -70.8    | -87.8 | -55.4    | -79.2      | -97.8      | -51.3       |
| 6:2 FTS  | 126.5 | -57.7    | -45.8 | 126.1    | -21.1      | -83.8      | 166.8       |
| FOSA     | -28.6 | -68.9    | -81.8 | -67.8    | -88.6      | -99.5      | -53.2       |
| N-MeFOSE | -27.9 | -69.2    | -95.6 | -96.0    | -96.7      | -99.8      | -71.1       |
| N-MeFOSA | -28.2 | -70.1    | -93.6 | -88.6    | -96.9      | -98.3      | -67.5       |
| N-EtFOSE | -27.6 | -78.5    | -99.4 | -96.3    | -99.2      | -99.9      | -94.3       |
| N-EtFOSA | -24.2 | -74.8    | -97.1 | -92.5    | -98.2      | -98.7      | -88.3       |

see table S6

Table S11. Recovery rates percent (mean± relative standard deviation) for all target compounds determined by repeated spiking of different type of samples. For abbreviations and structure information on the target compounds, see table S6 (colored cells indicate compounds with low recoveries, that were not quantified). Accepted recovery % :40-125%. Recoveries of 6:2 FTS were determined using matrix matched calibration curves.

| Compound | Seawater |           | Fish muscle |            | Fish liver |            | Sediment   |            | Crab       |            | Plankton   |           | Worm       | Gull      |           |
|----------|----------|-----------|-------------|------------|------------|------------|------------|------------|------------|------------|------------|-----------|------------|-----------|-----------|
|          | 3 ng/L   | 50 ng/L   | 1 ng/g      | 25 ng/g    | 1 ng/g     | 25 ng/g    | 1 ng/g     | 25 ng/g    | 1 ng/g     | 25 ng/g    | 1 ng/g     | 25 ng/g   | 25 ng/g    | 1 ng/g    | 25 ng/g   |
|          | (n=4)    | (n=6)     | (n=4)       | (n=6)      | (n=4)      | (n=6)      | (n=4)      | (n=6)      | (n=4)      | (n=6)      | (n=4)      | (n=6)     | (n=3)      | (n=4)     | (n=6)     |
| PFBA     | 54±42    | 95±14     | 80±15       | 107.2±6.7  | 76±7       | 98±11      | -          | 68±11      | 82±17      | 57±31      | 138±26     | 106±25    | 111±13     | 113.8±3.5 | 110.6±1.5 |
| PFHxA    | 104±5    | 116±1     | 81.9±9.9    | 111.2±5.9  | 81.9±9.9   | 111.2±5.9  | 119.0±8.3  | 113.5±2.6  | 124.9±7.6  | 121.3±9.1  | 110.3±1.0  | 113.6±4.3 | 108.1±3.3  | 113.8±3.5 | 110.6±1.5 |
| PFHpA    | 108±6    | 116±1     | 92.4±12.9   | 95.1±9.2   | 92.4±12.9  | 95.1±9.2   | 110.6±9.6  | 109.2±3.4  | 101.4±     | 108.5±5.9  | 101.5±6.6  | 101.2±4.0 | 97.0±3.9   | 104.0±3.7 | 100.4±4.9 |
| PFOA     | 111±3    | 118±2     | 106.8±5.1   | 113.0±5.4  | 106.8±5.1  | 113.0±5.4  | 96.4±10.7  | 122.3±5.8  | 98.8±5.9   | 123.5±5.7  | 115.4±4.2  | 116.1±2.1 | 114.0±2.9  | 119.8±2.5 | 114.2±5.3 |
| PFNA     | 109±2    | 117±1     | 114.3±9.4   | 107.3±2.8  | 114.3±9.4  | 107.3±2.8  | 89.4±12.8  | 114.8±4.2  | 98.9±10.9  | 125.6±11.3 | 107.0±5.7  | 104.8±1.6 | 106.4±3.2  | 111.3±2.5 | 116±4     |
| PFDA     | 109±2    | 116±1     | 114.8±8.1   | 106.5±3.8  | 114.8±8.1  | 106.5±3.8  | 117.7±4.6  | 112.6±2.4  | 116.4±5.4  | 113.8±10.3 | 103.1±1.5  | 109.4±3.9 | 106.3±3.1  | 110.5±3.1 | 108±4     |
| PFUnDA   | 106±2    | 119±2     | 126.0±5.3   | 115.3±1.6  | 126.0±5.3  | 115.3±1.6  | 126.5±3.9  | 121.0±2.4  | 131.7±0.5  | 122.4±6.0  | 115.2±0.40 | 120±4     | 118.6±2.5  | 129.3±3.3 | 118±4     |
| PFDoDA   | 101±2    | 130±1     | 118.3±6.8   | 102.2±16.4 | 118.3±6.8  | 102.2±16.4 | 118.4±4.0  | 116.0±3.1  | 120.3±5.1  | 111.3±12.7 | 108.2±1.2  | 113.3±4.3 | 110.3±2.0  | 114.7±3.2 | 128.9±2.7 |
| PFTTrDA  | 72±4     | 117±4     | 114.7±6.0   | 100.3±6.7  | 114.7±6.0  | 100.3±6.7  | 128.8±6.5  | 117.9±12.7 | 69.0±12.2  | 94.3±21.7  | 93.7±3.7   | 96.8±4.1  | 102.1±4.2  | 52.0±18.5 | 107±4     |
| PFTeDA   | 50±4     | 75±4      | 86.1±5.7    | 80.2±6.5   | 86.1±5.7   | 80.2±6.5   | 192.2±8.6  | 109.8±27.6 | 84.1±4.0   | 82.3±8.9   | 40.2±6.3   | 110±10    | 89.3±15.0  | 47.3±3.7  | 95±16     |
| PFBS     | 115±6    | 117±1     | 59.9±6.9    | 51.0±14.4  | 59.9±6.9   | 51.0±14.4  | 72.6±5.3   | 89.0±5.2   | 121.1±42.4 | 116.9±9.2  | 76.8±6.3   | 75.7±6.1  | 124.2±16.9 | 68.4±5.1  | 75.1±1.8  |
| PFHxS    | 111±2    | 120.0±0.8 | 98.8±9.8    | 94.8±5.1   | 98.8±9.8   | 94.8±5.1   | 85.5±7.4   | 112.8±3.1  | 114.1±9.4  | 125.5±5.9  | 102.8±3.2  | 101.7±1.7 | 99.4±2.2   | 102.±2.3  | 73.4±2.8  |
| L-PFOS   | 112±3    | 118±2     | 120.8±9.7   | 104.0±1.6  | 120.8±9.7  | 104.0±1.6  | 92.0±10.9  | 125.4±2.6  | 113.5±9.6  | 125.2±5.8  | 119.7±8.0  | 113.5±2.1 | 110.5±4.8  | -         | 121±16    |
| 6:2 FTS  | 94±6     | 119±3     | 50±34       | 88.7±7.1   | 107±2      | 108±11     | 107±10     | 103±16     | 88±11      | 89±7.0     | 125±10     | 127±2.0   | 124±2.0    | 109±9.0   | 109±6.0   |
| FOSA     | 53±51    | 92±7      | 51.3±12.7   | 52.4±4.9   | 51.3±12.7  | 52.4±4.9   | 104.7±25.1 | 79±26      | 115.8±11.9 | 111.5±22.4 | 52±14      | 57±6      | 79.7±9.9   | 62.7±3.7  | 72.8±5.0  |
| N-MeFOSE | 7±55     | 6±32      | 43±45       | 43±33      | 34±29      | 93±29      | 84±18      | 67±28      | 37±7       | 32±21      | 33±12      | 23±46     | 42±22      | 84±37     | 92±14     |
| N-MeFOSA | -        | 0.3±17    | 63±25       | 18±61      | 64±12      | 68±10      | 12±26      | 13±34      | 38±6       | 28±32      | 26±14      | 13±29     | 53±20      | 84±13     | 110±17    |
| N-EtFOSE | 11±52    | 9±21      | 50±13       | 103±67     | 105±20     | 88±13      | 108±14     | 44±63      | 25±4       | 8±96       | 7±194      | 2±27      | 4±6        | 95±12     | 74±11     |
| N-EtFOSA | 0.6±83   | 0.7±11    | 8±68        | 8±41       | 72±13      | 71±14      | 44±6       | 13±36      | 36±2       | 11±29      | 25±67      | 5±7       | 13±14      | 55±32     | 76±15     |

Table S12. Recovery rates percent (mean± relative standard deviation) for all internal standards determined by repeated spiking of different type of samples. For abbreviations and structure information on the target compounds, see table S6.

| Compound                                | Seawater (n=8) | Fish muscle (n=8) | Fish liver (n=8) | Glaucous gull (n=8) | Worms (n=3) | Plankton (n=8) | Sediment (n=5) | Crab avg (n=8) |
|-----------------------------------------|----------------|-------------------|------------------|---------------------|-------------|----------------|----------------|----------------|
| [ <sup>13</sup> C <sub>4</sub> ]-PFBA   | 11.6±20.6      | 48.1±23.7         | 9.6±131.8        | 18.7±44.6           | 2.6±173.2   | 9.0±31.1       | 20.5±62.6      | 4.3±97.0       |
| [ <sup>13</sup> C <sub>5</sub> ]-PFHxA  | 13.0±15.5      | 48.7±19.6         | 14.7±13.7        | 43.7±13.3           | 9.8±1.8     | 24.2±9.3       | 33.8±12.5      | 17.4±14.1      |
| [ <sup>13</sup> C <sub>4</sub> ]-PFHpA  | 78.3±2.2       | 87.4±14.5         | 78.9±13.4        | 96.2±15.5           | 46.6±24.7   | 51.7±8.9       | 62.6±24.0      | 62.2±13.1      |
| [ <sup>13</sup> C <sub>4</sub> ]-PFOA   | 42.6±9.3       | 49.6±8.9          | 28.1±13.1        | 31.7±12.1           | 30.5±27.7   | 35.7±5.9       | 34.3±39.6      | 51.2±6.8       |
| [ <sup>13</sup> C <sub>5</sub> ]-PFNA   | 61.6±5.0       | 91.6±13.3         | 55.8±17.8        | 86.9±14.3           | 69.1±11.8   | 52.3±7.9       | 35.0±36.5      | 0.0±68.3       |
| [ <sup>13</sup> C <sub>2</sub> ]-PFDA   | 65.1±4.9       | 101.1±9.3         | 60.1±10.6        | 82.1±14.0           | 71.4±9.2    | 45.7±10.2      | 36.3±26.8      | 76.0±12.9      |
| [ <sup>13</sup> C <sub>2</sub> ]-PFUnDA | 79.0±11.0      | 112.2±14.0        | 85.6±20.8        | 99.8±14.5           | 71.9±14.0   | 43.4±9.7       | 38.5±19.8      | 119.4±8.9      |
| [ <sup>13</sup> C <sub>2</sub> ]-PFDoDA | 65.9±11.5      | 126.1±8.1         | 103.8±20.2       | 76.9±15.2           | 80.5±10.5   | 43.4±10.8      | 40.4±13.3      | 125.6±9.3      |
| [ <sup>18</sup> O <sub>2</sub> ]-PFHxS  | 39.3±10.7      | 59.0±16.0         | 38.3±15.6        | 72.6±12.7           | 22.5±15.1   | 42.4±5.7       | 35.0±47.2      | 24.3±14.8      |
| [ <sup>13</sup> C <sub>4</sub> ]-PFOS   | 104.3±11.7     | 115.6±14.8        | 93.8±17.1        | 118.8±19.8          | 101.7±18.2  | 74.7±15.3      | 75.5±26.0      | 109.0±8.4      |
| [ <sup>2</sup> H <sub>3</sub> ]-MeFOSA  | 82.2±8.6       | 119.5±13.4        | 37.6±96.9        | 83.5±15.5           | 70.7±4.3    | 42.0±11.6      | 36.3±23.3      | 59.5±76.7      |



## Sample analysis results

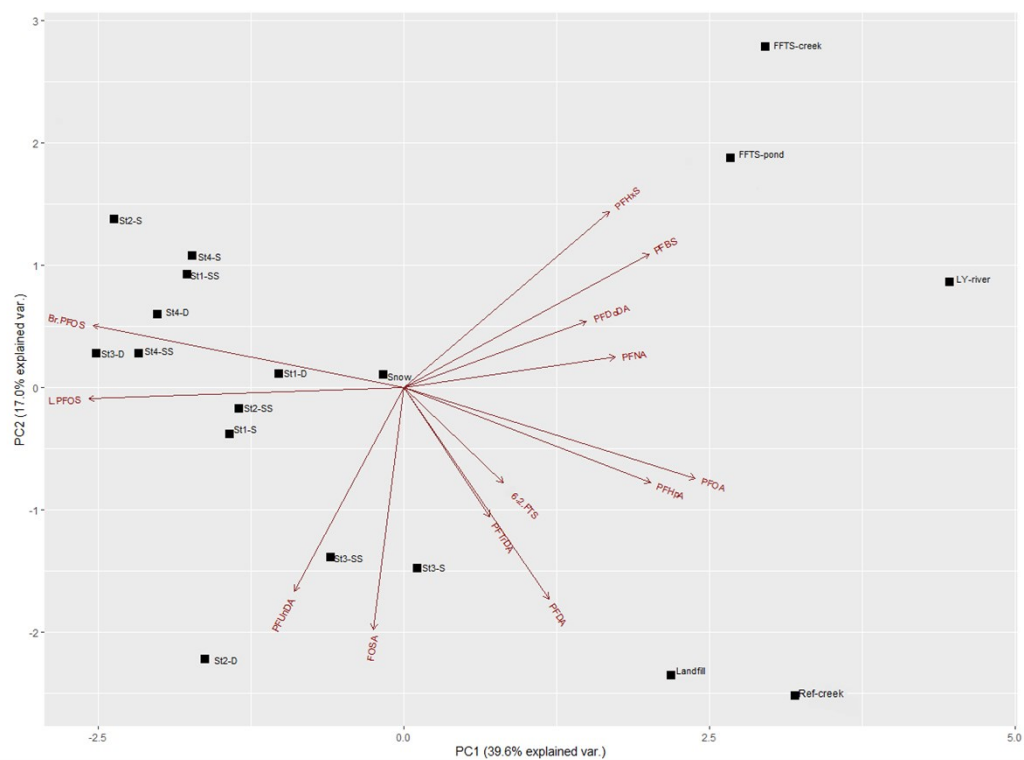

Figure S5. PCA biplots of PCA for PFAS profiles of the various samples (i.e. % of  $\sum_{14} \text{PFAS}$ ) with PC1 and 2 explaining more than 56% of the variation.

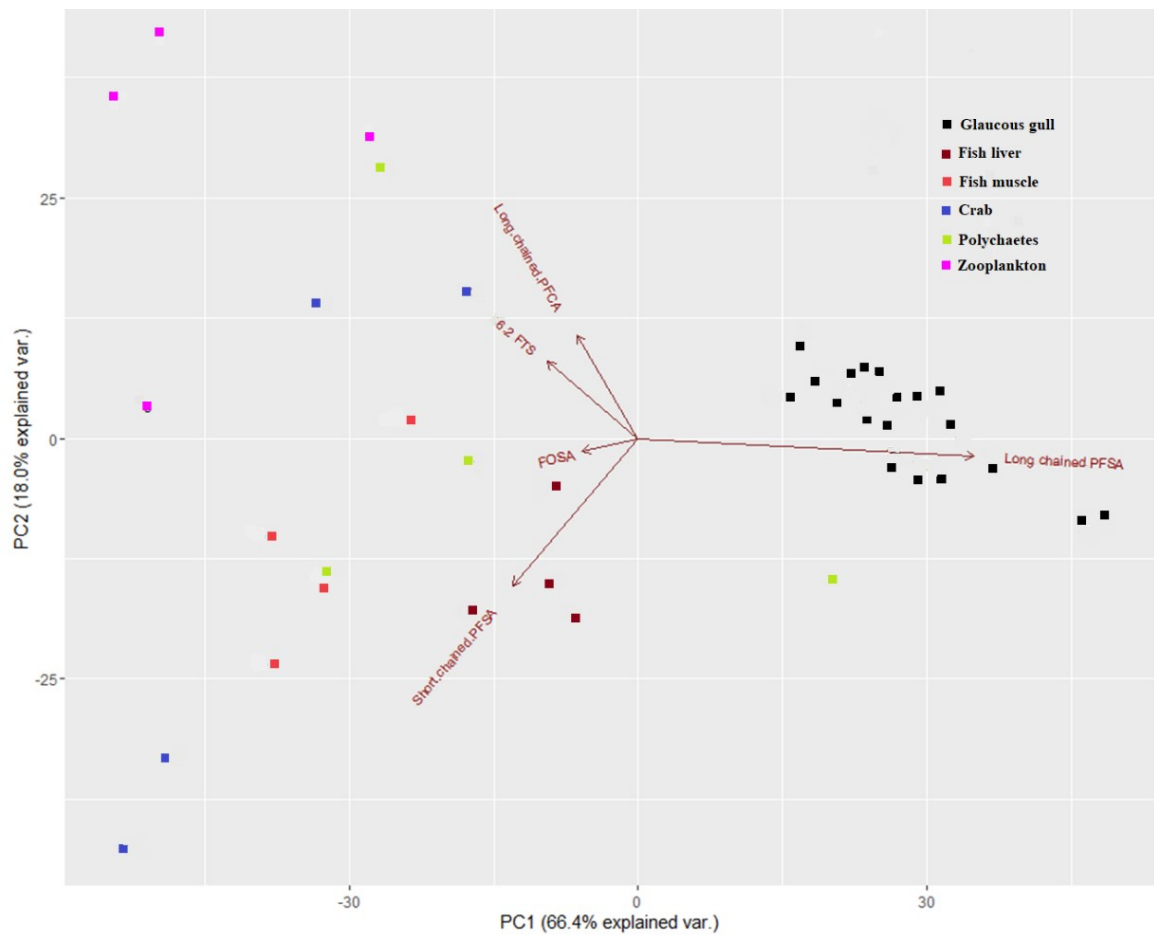

Figure S6. PCA biplots of PCA for PFAS profiles of the biota samples collected from the Adventfjord and the Isfjord, near the Svalbard Airport. (i.e. % of  $\sum 14$ PFAS) with PC1 and 2 explaining more than 84% of the variation.s (Levels <LOQ were treated as zero in this figure). Short-chained PFCA: PFHxA and PFHpA; long-chained PFCA: C8-C14; Short-chained PFSA: PFBS and PFHxS; Long-chained PFSA: PFOS.

## Sample analysis results

Table S13. PFAS concentrations in seawater and fresh water (ng L<sup>-1</sup>± standard error of the mean) collected in the vicinity of Longyearbyen (Svalbard).

| Sample               | PFHxA       | PFHpA     | PFOA        | PFNA        | PFDA        | PFUnDA    | PFDoDA     | PFTrDA | PFTeDA | PFBS        | PFHxS       | ∑PFOS       | 6:2 FTS   | FOSA        | ∑ <sub>14</sub> PFAS |
|----------------------|-------------|-----------|-------------|-------------|-------------|-----------|------------|--------|--------|-------------|-------------|-------------|-----------|-------------|----------------------|
| St1-surface(n=2)     | nd          | nd        | 0.19±0.03   | (0.035)     | nd          | (0.11)    | nd         | nd     | nd     | nd          | (0.38)      | 4.37±1.31   | (0.54)    | (0.03)      | 5.12±0.97            |
| St1-subsurface (n=2) | nd          | nd        | 0.14±0.09   | (0.035)     | nd          | (0.11)    | nd         | nd     | nd     | (0.055)     | (0.38)      | 6.41±2.09   | (0.54)    | nd          | 7.71±1.87            |
| St1-deep (n=2)       | (0.13)      | (0.17)    | 0.19±0.14   | (0.035)     | nd          | (0.11)    | nd         | nd     | nd     | (0.055)     | 0.61±0.23   | 5.16±3.92   | (0.54)    | (0.03)      | 6.98±2.87            |
| St2-surface(n=2)     | (0.13)      | (0.17)    | 0.17±0.01   | (0.035)     | nd          | (0.11)    | nd         | nd     | nd     | nd          | (0.38)      | 9.16±3.23   | nd        | nd          | 10.06±1.17           |
| St2-subsurface (n=2) | nd          | (0.17)    | 0.28±0.04   | (0.035)     | (0.04)      | (0.11)    | nd         | nd     | nd     | nd          | 0.61±0.24   | 6.51±1.65   | nd        | (0.03)      | 7.59±0.45            |
| St2-deep (n=2)       | (0.13)      | (0.17)    | 0.17±0.01   | (0.035)     | (0.04)      | 0.35±0.24 | nd         | nd     | nd     | (0.055)     | (0.38)      | 4.92±0.52   | nd        | (0.03)      | 6.20±2.6             |
| St3-surface (n=4)    | 0.32±0.19   | (0.17)    | 0.80±0.54   | (0.035)     | (0.04)      | (0.11)    | nd         | nd     | nd     | (0.055)     | (0.38)      | 4.02±1.68   | (0.54)    | (0.03)      | 4.45±0.59            |
| St3-subsurface(n=4)  | (0.13)      | (0.17)    | 0.22±0.02   | (0.035)     | (0.04)      | (0.11)    | nd         | nd     | nd     | nd          | (0.38)      | 4.37±3.51   | (0.54)    | (0.03)      | 6.11±0.63            |
| St3-deep (n=2)       | (0.13)      | (0.17)    | 0.21±0.02   | (0.035)     | nd          | 0.25±0.09 | nd         | nd     | nd     | nd          | (0.38)      | 8.61±1.45   | nd        | (0.03)      | 9.75±1.87            |
| St4-surface (n=2)    | nd          | (0.17)    | 0.12±0.09   | (0.035)     | nd          | (0.11)    | nd         | nd     | nd     | (0.055)     | (0.38)      | 4.41±2.10   | nd        | nd          | 5.27±1.77            |
| St4-subsurface (n=2) | (0.13)      | nd        | 0.16±0.01   | (0.035)     | nd          | (0.11)    | nd         | nd     | nd     | (0.055)     | (0.38)      | 5.13±1.77   | nd        | (0.03)      | 5.97±1.19            |
| St4-deep (n=2)       | nd          | nd        | 0.13±0.11   | (0.035)     | (0.04)      | (0.11)    | nd         | nd     | nd     | (0.055)     | (0.38)      | 7.90±4.02   | nd        | nd          | 8.64±2.94            |
| Ref-creek (n=2)      | 0.38±0.01   | 0.93±0.03 | 1.00±0.01   | 0.83±0.11   | (0.04)      | (0.11)    | nd         | nd     | nd     | (0.055)     | 0.38±0.06   | 1.58±0.20   | <LOQ      | (0.03)      | 5.86±0.1             |
| LY (n=2)             | 0.67±0.17   | 0.73±0.01 | 0.73±0.10   | (0.035)     | (0.04)      | (0.11)    | (0.55)     | nd     | nd     | 0.32±0.01   | 0.69±0.32   | 2.48±0.80   | <LOQ      | nd          | 7.054±2              |
| Snow (n=2)           | 0.290±0.003 | <LOQ      | 0.360±0.007 | 0.220±0.001 | 0.087±0.001 | (0.11)    | (0.55)     | nd     | nd     | 0.260±0.007 | 1.950±0.023 | 14.52±0.033 | <LOQ      | 0.140±0.001 | 18.70±0.04           |
| Landfill (n=2)       | 67.3±2.2    | 30.0±0.84 | 141.0±3.0   | 41.3±1.6    | 3.24±0.11   | 12.4±0.56 | 0.18±0.001 | (0.05) | nd     | 5.92±0.19   | 44.9±0.81   | 289.3±29.15 | <LOQ      | 3.28±0.07   | 643.6±84             |
| FFTS-pond (n=2)      | 15.9±0.40   | 4.97±0.08 | 44.4±0.27   | 111.0±0.37  | 1.21±0.05   | 1.07±0.03 | (0.55)     | nd     | nd     | 3.18±0.01   | 63.91±0.44  | 115.8±1.31  | 4.47±1.02 | 0.16±0.002  | 365.4±8.00           |
| FFTS-creek (n=2)     | 10.4±0.43   | 3.63±0.13 | 6.73±0.04   | 0.78±0.02   | (0.04)      | (0.11)    | (0.55)     | nd     | nd     | 1.90±0.02   | 13.19±0.74  | 19.09±0.87  | 1.46±0.08 | (0.03)      | 57.4±4.0             |

Table S14. PFAS concentrations in sediment samples ( $\mu\text{g kg}^{-1}\text{d.w.} \pm$  standard error of the mean) collected in the marine environment and a leachate channel of a landfill in the vicinity of Longyearbyen (Svalbard)

| PFAS            | Station 1 |                     | Station 2 |                     | Station 3 |                     | Station 4 |                     | Landfill |                   |
|-----------------|-----------|---------------------|-----------|---------------------|-----------|---------------------|-----------|---------------------|----------|-------------------|
|                 | n         | Mean $\pm$ SE       | n        | Mean $\pm$ SE     |
| PFHxA           | 3/3       | 0.0158 $\pm$ 0.0010 | 2/3       | 0.0098 $\pm$ 0.0051 | 0/3       | nd                  | 1/3       | 0.0029 $\pm$ 0.0029 | 3/3      | 0.339 $\pm$ 0.010 |
| PFHpA           | 2/3       | 0.0098 $\pm$ 0.0049 | 0/3       | nd                  | 2/3       | 0.0133 $\pm$ 0.006  | 1/3       | 0.0058 $\pm$ 0.0057 | 2/3      | 0.169 $\pm$ 0.009 |
| PFOA            | 3/3       | 0.0383 $\pm$ 0.0023 | 3/3       | 0.0285 $\pm$ 0.0004 | 3/3       | 0.036 $\pm$ 0.0015  | 3/3       | 0.0274              | 3/3      | 1.203 $\pm$ 0.028 |
| PFNA            | 3/3       | 0.0678 $\pm$ 0.0048 | 3/3       | 0.0417 $\pm$ 0.0027 | 3/3       | 0.0340 $\pm$ 0.0023 | 1/3       | 0.0087 $\pm$ 0.0087 | 3/3      | 1.80 $\pm$ 0.024  |
| PFDA            | 3/3       | 0.0204 $\pm$ 0.004  | 3/3       | 0.0176 $\pm$ 0.0005 | 3/3       | 0.0237 $\pm$ 0.003  | 2/3       | 0.0092 $\pm$ 0.0045 | 3/3      | 0.860 $\pm$ 0.017 |
| PFUnDA          | 3/3       | 0.0445 $\pm$ 0.0013 | 3/3       | 0.0354 $\pm$ 0.0032 | 3/3       | 0.0292 $\pm$ 0.0023 | 3/3       | 0.0250 $\pm$ 0.0037 | 3/3      | 25.5 $\pm$ 0.486  |
| PFDoDA          | 3/3       | 0.0148 $\pm$ 0.0005 | 3/3       | 0.0177 $\pm$ 0.0011 | 3/3       | 0.0296 $\pm$ 0.0036 | 3/3       | 0.0136 $\pm$ 0.0010 | 3/3      | 0.693 $\pm$ 0.016 |
| PFTTrDA         | 3/3       | 0.0208 $\pm$ 0.0007 | 3/3       | 0.0226 $\pm$ 0.0026 | 3/3       | 0.0337 $\pm$ 0.0074 | 3/3       | 0.0162 $\pm$ 0.0021 | 3/3      | 4.22 $\pm$ 0.111  |
| PFTeDA          | 3/3       | 0.0145 $\pm$ 0.0004 | 3/3       | 0.0178 $\pm$ 0.0018 | 3/3       | 0.0356 $\pm$ 0.0056 | 3/3       | 0.0129 $\pm$ 0.0004 | 3/3      | 0.045 $\pm$ 0.023 |
| PFBS            | 3/3       | 0.0198 $\pm$ 0.0046 | 2/3       | 0.0124 $\pm$ 0.0075 | 0/3       | nd                  | 1/3       | 0.0069 $\pm$ 0.0068 | 3/3      | 0.081 $\pm$ 0.012 |
| PFHxS           | 3/3       | 0.0398 $\pm$ 0.0012 | 3/3       | 0.0446 $\pm$ 0.0041 | 3/3       | 0.0245 $\pm$ 0.0026 | 3/3       | 0.0229 $\pm$ 0.0038 | 3/3      | 0.461 $\pm$ 0.010 |
| Br-PFOS         | 3/3       | 0.0441 $\pm$ 0.0001 | 3/3       | 0.0341 $\pm$ 0.0064 | 0/3       | nd                  | 0/3       | nd                  | 3/3      | 2.59 $\pm$ 0.230  |
| L-PFOS          | 3/3       | 0.2510 $\pm$ 0.0323 | 3/3       | 0.1780 $\pm$ 0.0007 | 3/3       | 0.0491 $\pm$ 0.0033 | 1/3       | 0.0119 $\pm$ 0.0119 | 3/3      | 42.8 $\pm$ 1.77   |
| 6:2 FTSA        | 3/3       | 3.99 $\pm$ 3.89     | 0/3       | nd                  | 1/3       | 0.208 $\pm$ 0.360   | 0/3       | nd                  | 0/3      | nd                |
| FOSA            | 3/3       | 0.0128 $\pm$ 0.0001 | 3/3       | 0.0129 $\pm$ 0.0002 | 3/3       | 0.0135 $\pm$ 0.0001 | 0/3       | nd                  | 3/3      | 0.782 $\pm$ 0.010 |
| $\Sigma$ 14PFAS |           | 4.61 $\pm$ 3.92     |           | 0.474 $\pm$ 0.013   |           | 0.530 $\pm$ 0.181   |           | 0.1634 $\pm$ 0.0279 |          | 81.6 $\pm$ 2.13   |

Table S15. Sediment/water partition coefficients ( $\log K_d$  in  $\text{dm}^3 \text{kg}^{-1}$ ), derived from sediment and water samples taken at the same station, assuming local equilibrium.

| PFAS   | Landfill sediment<br>(n=3) | Marine sediment<br>(n=12) |
|--------|----------------------------|---------------------------|
| PFHxA  | 0.68±0.03                  | -                         |
| PFHpA  | 0.85±0.03                  | -                         |
| PFOA   | 0.94±0.001                 | -                         |
| PFNA   | 1.6±0.05                   | -                         |
| PFDA   | 2.4±0.74                   | -                         |
| PFUnDA | 3.3±1.4                    | 2.4±1.7                   |
| PFBS   | 0.52±0.32                  | -                         |
| PFHxS  | 1.0±0.01                   | -                         |
| PFOS   | 2.0±0.60                   | 1.4±1.2                   |
| FOSA   | 2.7±1.5                    | -                         |

Table S16. PFAS levels in zooplankton samples from the stations St1-4 in Adventfjorden ( $\mu\text{g kg}^{-1}$  ww± standard error of the mean).

| PFAS             | Station 1 |               | Station 2 |               | Station 3 |               | Station 4 |                |
|------------------|-----------|---------------|-----------|---------------|-----------|---------------|-----------|----------------|
|                  | n         | Mean±SE       | n         | Mean±SE       | n         | Mean±SE       | n         | Mean±SE        |
| PFHxA            | 0/3       | nd            | 0/3       | nd            | 0/3       | nd            | 0/3       | nd             |
| PFHpA            | 0/3       | nd            | 0/3       | nd            | 0/3       | nd            | 0/3       | nd             |
| PFOA             | 3/3       | 0.0292±0.0039 | 3/3       | 0.0270±0.0016 | 3/3       | 0.0274±0.0027 | 3/3       | 0.0238±0.0050  |
| PFNA             | 1/3       | 0.0067±0.0066 | 1/3       | 0.0071±0.0071 | 2/3       | 0.0155±0.0077 | 0/3       | nd             |
| PFDA             | 2/3       | 0.0133±0.0066 | 3/3       | 0.0219±0.007  | 3/3       | 0.0201±0.0014 | 3/3       | 0.0198±0.0001  |
| PFUnDA           | 3/3       | 0.0450±0.0045 | 3/3       | 0.0367±0.0016 | 3/3       | 0.0375±0.0024 | 3/3       | 0.0421±0.0008  |
| PFDoDA           | 3/3       | 0.0204±0.0023 | 3/3       | 0.0181±0.005  | 3/3       | 0.0161±0.0001 | 3/3       | 0.0175±0.00001 |
| PFTTrDA          | 3/3       | 0.0274±0.0033 | 3/3       | 0.0226±0.0017 | 3/3       | 0.0202±0.0013 | 3/3       | 0.0269±0.0018  |
| PFTeDA           | 0/3       | nd            | 0/3       | nd            | 0/3       | nd            | 0/3       | nd             |
| PFBS             | 0/3       | nd            | 1/3       | 0.0078±0.0078 | 2/3       | 0.7356±0.7088 | 1/3       | 0.0093±0.0093  |
| PFHxS            | 0/3       | nd            | 0/3       | nd            | 2/3       | 0.0131±0.0131 | 0/3       | nd             |
| Br-PFOS          | 0/3       | nd            | 0/3       | nd            | 2/3       | 0.0093±0.0083 | 1/3       | 0.0156±0.0156  |
| L-PFOS           | 0/3       | nd            | 1/3       | 0.0046±0.0046 | 1/3       | 0.0146±0.0145 | 1/3       | 0.2270±0.02270 |
| 6:2 FTS          | 1/3       | 0.1895±0.328  | 3/3       | 1.87±0.832    | 3/3       | 0.6009±0.3392 | 2/3       | 0.1667±0.0833  |
| FOSA             | 2/3       | 0.0107±0.0054 | 3/3       | 0.0146±0.0005 | 3/3       | 0.0150±0.0007 | 0/3       | nd             |
| $\sum_{14}$ PFAS | -         | 0.3421±0.1886 | -         | 2.03±0.82     | -         | 1.525±1.397   | -         | 0.5486±0.3044  |

Table S17. PFAS levels in polychaete samples from marine sediments stations St1-4 in Adventfjorden ( $\mu\text{g kg}^{-1}$  ww  $\pm$  standard error of the mean).

| PFAS               | Station 1 |                     | Station 2 |                     | Station 2 |                     | Station 2 |                     |
|--------------------|-----------|---------------------|-----------|---------------------|-----------|---------------------|-----------|---------------------|
|                    | n         | Mean $\pm$ SE       |
| PFHxA              | 0/3       | nd                  | 0/3       | nd                  | 0/3       | nd                  | 0/3       | nd                  |
| PFHpA              | 0/3       | nd                  | 0/3       | nd                  | 1/3       | 0.1176 $\pm$ 0.1176 | 0/3       | nd                  |
| PFOA               | 0/3       | nd                  | 0/3       | 0.0665 $\pm$ 0.0283 | 2/3       | 0.1602 $\pm$ 0.0870 | 3/3       | 0.1430 $\pm$ 0.0218 |
| PFNA               | 2/3       | 0.0677 $\pm$ 0.0340 | 2/3       | 0.0432 $\pm$ 0.0176 | 2/3       | 0.0738 $\pm$ 0.0368 | 1/3       | 0.0307 $\pm$ 0.0307 |
| PFDA               | 3/3       | 0.0401 $\pm$ 0.0029 | 3/3       | 0.020 $\pm$ 0.0079  | 2/3       | 0.0396 $\pm$ 0.0200 | 3/3       | 0.0457 $\pm$ 0.0086 |
| PFUnDA             | 3/3       | 0.0745 $\pm$ 0.005  | 3/3       | 0.0429 $\pm$ 0.0178 | 3/3       | 0.0903 $\pm$ 0.0136 | 3/3       | 0.0698 $\pm$ 0.0096 |
| PFDoDA             | 2/3       | 0.0195 $\pm$ 0.0098 | 2/3       | 0.0231 $\pm$ 0.0100 | 3/3       | 0.0420 $\pm$ 0.0063 | 3/3       | 0.040 $\pm$ 0.004   |
| PFTTrDA            | 3/3       | 0.1750 $\pm$ 0.0430 | 3/3       | 0.1230 $\pm$ 0.0520 | 3/3       | 0.1190 $\pm$ 0.0118 | 3/3       | 0.150 $\pm$ 0.026   |
| PFTeDA             | 3/3       | 0.0319 $\pm$ 0.0052 | 3/3       | 0.0144 $\pm$ 0.0053 | 3/3       | 0.0507 $\pm$ 0.0134 | 3/3       | 0.049 $\pm$ 0.009   |
| PFBS               | 3/3       | 0.1543 $\pm$ 0.0323 | 0/3       | nd                  | 1/3       | 0.0621 $\pm$ 0.0621 | 1/3       | 0.075 $\pm$ 0.075   |
| PFHxS              | 3/3       | 0.917 $\pm$ 0.1247  | 3/3       | 0.2056 $\pm$ 0.0295 | 3/3       | 1.01 $\pm$ 0.253    | 0/3       | nd                  |
| Br-PFOS            | 1/3       | 0.2323 $\pm$ 0.2323 | 1/3       | 0.0134 $\pm$ 0.0133 | 0/3       | nd                  | 1/3       | 0.0534 $\pm$ 0.0534 |
| L-PFOS             | 3/3       | 4.54 $\pm$ 1.04     | 2/3       | 0.2630 $\pm$ 0.1315 | 1/3       | 2.08 $\pm$ 2.08     | 1/3       | 0.414 $\pm$ 0.414   |
| 6:2 FTS            | 3/3       | 0.5971 $\pm$ 0.2592 | 0/3       | 0.0675 $\pm$ 0.0675 | 3/3       | 0.581 $\pm$ 0.378   | 3/3       | nd                  |
| FOSA               | 3/3       | 0.1922 $\pm$ 0.0636 | 3/3       | 0.0259 $\pm$ 0.0259 | 3/3       | 0.1110 $\pm$ 0.0128 | 3/3       | 0.047               |
| $\Sigma_{14}$ PFAS | -         | 7.043               | -         | 0.909 $\pm$ 0.1394  | -         | 4.54 $\pm$ 2.55     | -         | 1.12 $\pm$ 0.053    |

Table S18. Concentrations of PFAS ( $\mu\text{g kg}^{-1}$  ww) in crab samples collected from four stations in the vicinity of Longyearbyen (Svalbard).

| PFAS               | Station 1 (n=5) |                   |        | Station 2 (n=5) |                   |        | Station 3 (n=1) | Station 4 (n=7) |                   |        |
|--------------------|-----------------|-------------------|--------|-----------------|-------------------|--------|-----------------|-----------------|-------------------|--------|
|                    | n               | Mean $\pm$ SEM    | Median | n               | Mean $\pm$ SEM    | Median | St3_Crab        | n               | Mean $\pm$ SEM    | Median |
| PFHxA              | 0/5             | nd                | nd     | 0/5             | nd                | nd     | nd              | 0/7             | nd                | nd     |
| PFHpA              | 0/5             | nd                | nd     | 0/5             | nd                | nd     | nd              | 0/7             | nd                | nd     |
| PFOA               | 5/5             | 0.018             | 0.018  | 5/5             | 0.026 $\pm$ 0.007 | 0.018  | 0.018           | 7/7             | 0.040 $\pm$ 0.009 | 0.037  |
| PFNA               | 3/5             | 0.033 $\pm$ 0.013 | 0.049  | 3/5             | 0.027 $\pm$ 0.012 | 0.023  | nd              | 4/7             | 0.043 $\pm$ 0.019 | 0.039  |
| PFDA               | 5/5             | 0.055 $\pm$ 0.007 | 0.051  | 5/5             | 0.030 $\pm$ 0.006 | 0.030  | 0.033           | 7/7             | 0.043 $\pm$ 0.007 | 0.049  |
| PFUnDA             | 5/5             | 0.218 $\pm$ 0.052 | 0.204  | 5/5             | 0.120 $\pm$ 0.026 | 0.108  | 0.116           | 7/7             | 0.133 $\pm$ 0.025 | 0.146  |
| PFTTrDA            | 5/5             | 0.255 $\pm$ 0.195 | 0.180  | 5/5             | 0.144 $\pm$ 0.024 | 0.133  | 0.121           | 7/7             | 0.122 $\pm$ 0.023 | 0.132  |
| PFTeDA             | 5/5             | 0.062 $\pm$ 0.022 | 0.051  | 5/5             | 0.035 $\pm$ 0.002 | 0.035  | 0.030           | 7/7             | 0.041 $\pm$ 0.006 | 0.044  |
| PFBS               | 1/5             | 0.309 $\pm$ 0.691 | nd     | 1/5             | 4.50 $\pm$ 1.87   | 6.16   | 1.92            | 1/7             | nd                | nd     |
| PFHxS              | 0/5             | nd                | nd     | 0/5             | 0.144 $\pm$ 0.144 | nd     | nd              | 0/7             | nd                | nd     |
| Br-PFOS            | 2/5             | 0.033 $\pm$ 0.029 | nd     | 2/5             | nd                | nd     | 0.034           | 3/7             | 0.013 $\pm$ 0.008 | nd     |
| L-PFOS             | 4/5             | 0.276 $\pm$ 0.115 | 0.215  | 4/5             | 0.191 $\pm$ 0.012 | 0.195  | 0.158           | 7/7             | 0.312 $\pm$ 0.063 | 0.350  |
| 6:2 FTS            | 2/5             | 0.66 $\pm$ 0.43   | nd     | 2/5             | (0.08)            | nd     | (0.08)          | 3/7             | (0.08)            | nd     |
| FOSA               | 5/5             | 0.248 $\pm$ 0.044 | 0.210  | 5/5             | 0.269 $\pm$ 0.022 | 0.280  | 0.314           | 7/7             | 0.256 $\pm$ 0.049 | 0.235  |
| $\Sigma_{14}$ PFAS | -               | 1.56 $\pm$ 0.491  | 1.054  | -               | 5.629 $\pm$ 1.95  | 6.943  | 3.02            | -               | 1.02 $\pm$ 0.152  | 0.956  |

Table S19. Concentrations of PFAS ( $\mu\text{g kg}^{-1}$ ; w/w) in muscle of fish collected in the marine in the marine environment in the vicinity of Longyearbyen (Svalbard)

| PFAS*              | Station 1 |                   |        | Station 2 |                    |        | Station 3 |                   |        | Station 4 |                    |        |
|--------------------|-----------|-------------------|--------|-----------|--------------------|--------|-----------|-------------------|--------|-----------|--------------------|--------|
|                    | n         | Mean $\pm$ SEM    | median | n         | Mean $\pm$ SEM     | median | n         | Mean $\pm$ SEM    | median | n         | Mean $\pm$ SEM     | median |
| PFOA               | 5/5       | 0.021 $\pm$ 0.006 | 0.016  | 3/3       | 0.037 $\pm$ 0.005  | 0.034  | 11/11     | 0.027 $\pm$ 0.003 | 0.027  | 8/8       | 0.021 $\pm$ 0.002  | 0.021  |
| PFNA               | 5/5       | 0.046 $\pm$ 0.008 | 0.047  | 3/3       | 0.055 $\pm$ 0.002  | 0.055  | 11/11     | 0.049 $\pm$ 0.005 | 0.047  | 8/8       | 0.037 $\pm$ 0.006  | 0.040  |
| PFDA               | 5/5       | 0.028 $\pm$ 0.003 | 0.030  | 3/3       | 0.028 $\pm$ 0.001  | 0.028  | 11/11     | 0.028 $\pm$ 0.002 | 0.029  | 8/8       | 0.021 $\pm$ 0.002  | 0.020  |
| PFUnDA             | 5/5       | 0.085 $\pm$ 0.025 | 0.087  | 3/3       | 0.056 $\pm$ 0.005  | 0.054  | 11/11     | 0.062 $\pm$ 0.007 | 0.066  | 8/8       | 0.043 $\pm$ 0.008  | 0.033  |
| PFDoDA             | 5/5       | 0.025 $\pm$ 0.004 | 0.024  | 3/3       | 0.020 $\pm$ 0.001  | 0.020  | 11/11     | 0.021 $\pm$ 0.001 | 0.020  | 8/8       | 0.016 $\pm$ 0.001  | 0.016  |
| PFTTrDA            | 5/5       | 0.063 $\pm$ 0.021 | 0.048  | 3/3       | 0.033 $\pm$ 0.003  | 0.035  | 11/11     | 0.040 $\pm$ 0.003 | 0.042  | 8/8       | 0.029 $\pm$ 0.003  | 0.029  |
| PFTeDA             | 5/5       | 0.020 $\pm$ 0.002 | 0.018  | 3/3       | 0.015 $\pm$ 0.0001 | 0.016  | 11/11     | 0.019 $\pm$ 0.001 | 0.018  | 8/8       | 0.015 $\pm$ 0.001  | 0.016  |
| PFHxS              | 5/5       | 0.48 $\pm$ 0.17   | 0.360  | 3/3       | 0.010 $\pm$ 0.006  | 0.099  | 11/11     | 0.215 $\pm$ 0.033 | 0.204  | 7/8       | 0.0192 $\pm$ 0.068 | 0.147  |
| Br-PFOS            | 5/5       | 0.018 $\pm$ 0.005 | 0.015  | 3/3       | 0.013 $\pm$ 0.005  | 0.010  | 10/11     | 0.017 $\pm$ 0.002 | 0.018  | 8/8       | 0.017 $\pm$ 0.001  | 0.018  |
| L-PFOS             | 5/5       | 0.149 $\pm$ 0.044 | 0.123  | 3/3       | 0.140 $\pm$ 0.027  | 0.160  | 8/11      | 0.071 $\pm$ 0.018 | 0.066  | 8/8       | 0.087 $\pm$ 0.017  | 0.075  |
| FOSA               | 5/5       | 0.212 $\pm$ 0.124 | 0.121  | 3/3       | 0.140 $\pm$ 0.034  | 0.112  | 8/11      | 0.148 $\pm$ 0.063 | 0.096  | 8/8       | 0.045 $\pm$ 0.003  | 0.044  |
| $\Sigma_{14}$ PFAS | -         | 1.14 $\pm$ 0.19   | 1.244  | -         | 0.640 $\pm$ 0.068  | 0.586  | -         | 0.696 $\pm$ 0.068 | 0.686  | -         | 0.524 $\pm$ 0.09   | 0.475  |

\* PFHxA, PFHpA, 6:2 FTS, PFBS were not detected in any muscle sample.

Table S20. Concentrations of PFAS ( $\mu\text{g kg}^{-1}$ ; w/w) in liver of fish collected in the marine in the marine environment in the vicinity of Longyearbyen (Svalbard)

| PFAS*              | Station 1 |                   |        | Station 2 |                    |             | Station 3 |                    |        | Station 4 |                   |        |
|--------------------|-----------|-------------------|--------|-----------|--------------------|-------------|-----------|--------------------|--------|-----------|-------------------|--------|
|                    | n         | Mean $\pm$ SEM    | median | n         | Mean $\pm$ SEM     | median      | n         | Mean $\pm$ SEM     | median | n         | Mean $\pm$ SEM    | median |
| PFHxA              | 0/5       | nd                | nd     | 0/7       | nd                 | 0           | 3/12      | 0.134 $\pm$ 0.090  | 0.000  | 0/4       | nd                | nd     |
| PFHpA              | 0/5       | nd                | nd     | 0/7       | nd                 | 0           | 0/12      | nd                 | 0.000  | 0/4       | nd                | nd     |
| PFOA               | 2/5       | 0.247 $\pm$ 0.216 | 0.000  | 3/7       | 0.06 $\pm$ 0.030   | 0           | 4/12      | 0.025 $\pm$ 0.013  | 0.000  | 3/4       | 0.136 $\pm$ 0.053 | 0.153  |
| PFNA               | 5/5       | 0.385 $\pm$ 0.142 | 0.341  | 7/7       | 0.138 $\pm$ 0.027  | 0.129667274 | 12/12     | 0.241 $\pm$ 0.035  | 0.212  | 3/4       | 0.410 $\pm$ 0.143 | 0.486  |
| PFDA               | 4/5       | 0.223 $\pm$ 0.129 | 0.128  | 6/7       | 0.049 $\pm$ 0.010  | 0.05016601  | 12/12     | 0.116 $\pm$ 0.014  | 0.126  | 3/4       | 0.174 $\pm$ 0.085 | 0.177  |
| PFUnDA             | 5/5       | 0.661 $\pm$ 0.246 | 0.564  | 7/7       | 0.164 $\pm$ 0.019  | 0.17319068  | 12/12     | 0.357 $\pm$ 0.059  | 0.329  | 4/4       | 0.538 $\pm$ 0.136 | 0.583  |
| PFDoDA             | 5/5       | 0.179 $\pm$ 0.072 | 0.161  | 7/7       | 0.040 $\pm$ 0.006  | 0.037419633 | 12/12     | 0.069 $\pm$ 0.008  | 0.068  | 4/4       | 0.150 $\pm$ 0.032 | 0.157  |
| PFTTrDA            | 5/5       | 0.554 $\pm$ 0.161 | 0.557  | 7/7       | 0.140 $\pm$ 0.028  | 0.140520246 | 12/12     | 0.237 $\pm$ 0.053  | 0.171  | 4/4       | 0.495 $\pm$ 0.140 | 0.519  |
| PFTeDA             | 5/5       | 0.118 $\pm$ 0.062 | 0.058  | 6/7       | 0.022 $\pm$ 0.006  | 0.022609377 | 11/12     | 0.0167 $\pm$ 0.004 | 0.041  | 4/4       | 0.145 $\pm$ 0.058 | 0.122  |
| PFBS               | 0/5       | nd                | 0.000  | 2/7       | 0.027 $\pm$ 0.020  | 0           | 0/12      | nd                 | 0.000  | 1/4       | 0.066 $\pm$ 0.065 | 0.000  |
| PFHxS              | 4/5       | 3.02 $\pm$ 1.85   | 1.298  | 6/7       | 0.672 $\pm$ 0.250  | 0.367317029 | 10/12     | 1.693 $\pm$ 0.397  | 1.587  | 2/4       | 0.445 $\pm$ 0.280 | 0.310  |
| Br-PFOS            | 4/5       | 0.127 $\pm$ 0.054 | 0.122  | 6/7       | 0.103 $\pm$ 0.021  | 0.115676717 | 12/12     | 0.154 $\pm$ 0.028  | 0.112  | 2/4       | 0.157 $\pm$ 0.092 | 0.137  |
| L-PFOS             | 4/5       | 2.812 $\pm$ 1.12  | 2.166  | 7/7       | 0.993 $\pm$ 0.310  | 0.574313066 | 12/12     | 2.105 $\pm$ 0.661  | 1.416  | 3/4       | 2.046 $\pm$ 0.792 | 2.359  |
| 6:2 FTS            | 0/5       | nd                | 0.000  | 0/7       | nd                 | 0           | 0/12      | nd                 | 0.000  | nd        | nd                | 0.000  |
| FOSA               | 4/5       | 0.234 $\pm$ 0.10  | 0.151  | 7/7       | 0.216 $\pm$ 0.0739 | 0.138292607 | 12/12     | 0.255 $\pm$ 0.089  | 0.145  | 4/4       | 0.447 $\pm$ 0.213 | 0.298  |
| $\Sigma_{14}$ PFAS | -         | 8.56 $\pm$ 3.94   | 4.318  | -         | 2.624 $\pm$ 0.327  | 2.29086767  | -         | 5.467 $\pm$ 0.845  | 5.300  | -         | 5.2 $\pm$ 1.5     | 6.460  |

Table S21. Bioaccumulation factors (BAF,  $L \text{ kg}^{-1}$ ) for PFAS on Svalbard

| PFAS   | Log BAF <sub>fish muscle</sub> $\pm$ SE | Log BAF <sub>fish liver</sub> $\pm$ SE |
|--------|-----------------------------------------|----------------------------------------|
| PFOA   | 2.09 $\pm$ 0.103                        | 2.87 $\pm$ 0.210                       |
| PFNA   | 2.96 $\pm$ 0.141                        | 3.71 $\pm$ 0.249                       |
| PFDA   | 3.19 $\pm$ 0.161                        | 3.78 $\pm$ 0.357                       |
| PFUnDA | 2.61 $\pm$ 0.110                        | 3.41 $\pm$ 0.221                       |
| PFHxS  | 2.72 $\pm$ 0.140                        | 3.44 $\pm$ 0.196                       |
| L-PFOS | 1.52 $\pm$ 0.148                        | 2.61 $\pm$ 0.143                       |

Table S22. Concentrations of PFAS  $\mu\text{g kg}^{-1}$  (wet weight) detected in glaucous gull collected in Svalbard (n denotes number of samples detected of total number sampled).

| PFAS                 | n     | Mean±SEM    | Range       | Median |
|----------------------|-------|-------------|-------------|--------|
| PFHxA                | nd    | nd          | nd          | nd     |
| PFHpA                | 2/20  | 0.006±0.005 | nd-0.093    | nd     |
| PFOA                 | 13/20 | 0.101±0.025 | nd-0.326    | 0.093  |
| PFNA                 | 20/20 | 3.16±0.375  | 0.796-6.55  | 3.038  |
| PFDA                 | 20/20 | 1.95±0.190  | 0.743-3.61  | 2.060  |
| PFUnDA               | 20/20 | 4.38±0.556  | 1.40-11.9   | 4.484  |
| PFDoDA               | 20/20 | 0.710±0.078 | 0.320-1.78  | 0.685  |
| PFTTrDA              | 20/20 | 1.55±0.351  | 0.477-7.94  | 1.165  |
| PFTeDA               | 20/20 | 0.182±0.015 | 0.009-0.306 | 0.189  |
| PFBS                 | nd    | nd          | nd          | nd     |
| PFHxS                | 19/20 | 1.75±0.720  | nd-15.22    | 1.054  |
| Br-PFOS              | 20/20 | 3.62±2.50   | 0.156-51.1  | 0.878  |
| L-PFOS               | 20/20 | 51.4±18.0   | 12.4-382    | 28.986 |
| 6:2 FTS              | 19/20 | nd          | nd          | nd     |
| FOSA                 | nd    | 0.035±0.006 | nd-0.122    | 0.032  |
| Σ <sub>14</sub> PFAS | -     | 68.9±22.3   | 16.98-479   | 44.728 |

Table S23 Relative distribution (mean±SEM) of the sum [Σ] branched PFOS isomer (Br-PFOS) versus linear PFOS (L-PFOS) in abiotic and biotic samples in the Longyearbyen

| Sample             | Br-PFOS<br>% of sum<br>ΣPFOS | L-PFOS<br>% of<br>ΣPFOS | SEM  |
|--------------------|------------------------------|-------------------------|------|
| Snow               | 23.4                         | 76.6                    | 0.71 |
| Ref-creek          | 30.0                         | 70.0                    | 0.41 |
| FFTS-creek         | 31.2                         | 68.8                    | 0.78 |
| FFTS-pond          | 39.8                         | 60.2                    | 0.78 |
| Landfil leachate   | 27.1                         | 72.9                    | 0.91 |
| LY-river           | 26.3                         | 73.7                    | 0.91 |
| St-1-Seawater      | 27.9                         | 72.1                    | 0.82 |
| St-2-Seawater      | 26.3                         | 73.7                    | 1    |
| St-3-Seawater      | 27.0                         | 73.0                    | 0.65 |
| St-4-Seawater      | 29.6                         | 70.4                    | 0.47 |
| Marine sediment    | 20.5                         | 79.5                    | 0.7  |
| Lansdfill sediment | 6.7                          | 93.3                    | 0.1  |
| Zooplankton        | 21.9                         | 78.0                    | 2.2  |
| Polychaetes        | 15.4                         | 84.6                    | 2.3  |
| Crab               | 8.7                          | 91.3                    | 3.2  |
| Fish muscle        | 13.5                         | 86.5                    | 1.3  |
| Fish liver         | 18.7                         | 81.3                    | 2.34 |
| Glaucous gull      | 12.8                         | 87.1                    | 3.3  |



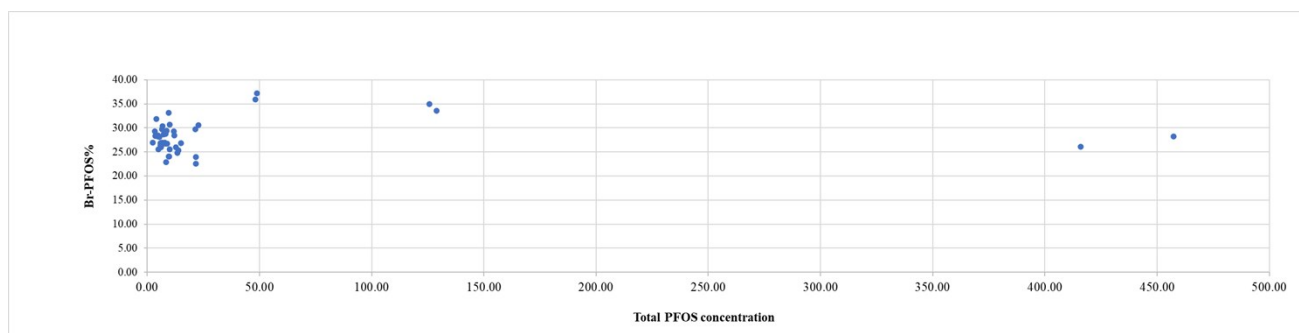

Figure S7. Sum  $[\Sigma]$  branched PFOS isomer percentages (Br-PFOS%) versus PFOS total concentration

## References

1. J. S. Skaar, E. M. Ræder, J. L. Lyche, L. Ahrens, and R. Kallenborn, Elucidation of contamination sources for poly-and perfluoroalkyl substances (PFASs) on Svalbard (Norwegian Arctic), *Environ. Sci. Pollut. Res.*, 2019, **26**, 7356-7363.
2. A. M. Ali, C. P. Higgins, W. M. Alarif, S. S. Al-Lihaibi, M. Ghandourah, and R. Kallenborn, Per- and polyfluoroalkyl substances (PFASs) in contaminated coastal marine waters of the Saudi Arabian Red Sea: a baseline study, *Environ. Sci. Pollut. Res.*, 2020, 1-13.
3. J. L. Guelfo, C. P. Higgins and technology, Subsurface transport potential of perfluoroalkyl acids at aqueous film-forming foam (AFFF)-impacted sites, *Environ. Sci. and Technol.* 2013, **47**, 4164-4171.
4. P. Labadie and M. Chevreuil, Partitioning behaviour of perfluorinated alkyl contaminants between water, sediment and fish in the Orge River (nearby Paris, France), *Environ. Pollut.* 2011, **159**, 391-397.
5. C. P. Higgins, R. G. Luthy, Sorption of perfluorinated surfactants on sediments, *Environ. Sci. and Technol.*, 2006, **40**, 7251-7256.
6. L. Ahrens, L. W. Yeung, S. Taniyasu, P. K. Lam and N. Yamashita, Partitioning of perfluorooctanoate (PFOA), perfluorooctane sulfonate (PFOS) and perfluorooctane sulfonamide (PFOSA) between water and sediment, *Chemosphere*, 2011, **85**, 731-737.
7. L. Ahrens, S. Taniyasu, L. W. Yeung, N. Yamashita, P. K. Lam and R. Ebinghaus, Distribution of polyfluoroalkyl compounds in water, suspended particulate matter and sediment from Tokyo Bay, Japan, *Chemosphere*, 2010, **79**, 266-272.
8. J. Milinovic, S. Lacorte, M. Vidal and A. Rigol, Sorption behaviour of perfluoroalkyl substances in soils, *Sci. Total Environ.*, 2015, **511**, 63-71.
9. C. R. Powley, S. W. George, T. W. Ryan and R. C. Buck, Matrix effect-free analytical methods for determination of perfluorinated carboxylic acids in environmental matrixes, *Anal. Chem.*, 2005, **77**, 6353-6358.
10. L. W. Yeung, A. O. De Silva, E. I. Loi, C. H. Marvin, S. Taniyasu, N. Yamashita, S. A. Mabury, D. C. Muir and P. K. Lam, Perfluoroalkyl substances and extractable organic fluorine in surface sediments and cores from Lake Ontario, *Environ. Int.* 2013, **59**, 389-397.
11. A. M. Ali, A. S. Nesse, S. Eich-Greatorex, T. A. Sogn, S. G. Aanrud, J. A. A. Bunæs, J. L. Lyche, and R. Kallenborn, Organic contaminants of emerging concern in

- Norwegian digestates from biogas production, *Environ Sci Process Impacts.*, 2019, **21**, 1498-1508.
12. T. Benijts, R. Dams, W. Lambert and A. De Leenheer, Countering matrix effects in environmental liquid chromatography–electrospray ionization tandem mass spectrometry water analysis for endocrine disrupting chemicals, *J. Chromatogr. A* , 2004, **1029**, 153-159.
  13. S. Souverain, S. Rudaz and J.-L. Veuthey, Matrix effect in LC-ESI-MS and LC-APCI-MS with off-line and on-line extraction procedures, *J. Chromatogr. A A*, 2004, **1058**, 61-66.
  14. E. Rogatsky and D. Stein, Evaluation of matrix effect and chromatography efficiency: new parameters for validation of method development, *J. Am. Soc. Mass Spectrom.*, 2005, **16**, 1757-1759.
